# Supplementary material
Source: PubMed Central journal article supplement (PMC4800034)
Supplement: mmc5.pdf [file mmc5.pdf]

# MEGSA: A Powerful and Flexible Framework for Analyzing Mutual Exclusivity of Tumor Mutations

Xing Hua,<sup>1</sup> Paula L. Hyland,<sup>1</sup> Jing Huang,<sup>2</sup> Lei Song,<sup>1</sup> Bin Zhu,<sup>1</sup> Neil E. Caporaso,<sup>1</sup> Maria Teresa Landi,<sup>1</sup> Nilanjan Chatterjee,<sup>1</sup> and Jianxin Shi<sup>1,\*</sup>

The central challenges in tumor sequencing studies is to identify driver genes and pathways, investigate their functional relationships, and nominate drug targets. The efficiency of these analyses, particularly for infrequently mutated genes, is compromised when subjects carry different combinations of driver mutations. Mutual exclusivity analysis helps address these challenges. To identify mutually exclusive gene sets (MEGS), we developed a powerful and flexible analytic framework based on a likelihood ratio test and a model selection procedure. Extensive simulations demonstrated that our method outperformed existing methods for both statistical power and the capability of identifying the exact MEGS, particularly for highly imbalanced MEGS. Our method can be used for de novo discovery, for pathway-guided searches, or for expanding established small MEGS. We applied our method to the whole-exome sequencing data for 13 cancer types from The Cancer Genome Atlas (TCGA). We identified multiple previously unreported non-pairwise MEGS in multiple cancer types. For acute myeloid leukemia, we identified a MEGS with five genes (*FLT3*, *IDH2*, *NRAS*, *KIT*, and *TP53*) and a MEGS (*NPM1*, *TP53*, and *RUNX1*) whose mutation status was strongly associated with survival ( $p = 6.7 \times 10^{-4}$ ). For breast cancer, we identified a significant MEGS consisting of *TP53* and four infrequently mutated genes (*ARID1A*, *AKT1*, *MED23*, and *TBL1XR1*), providing support for their role as cancer drivers.

## Introduction

Cancers, driven by somatic mutations, cause more than eight million deaths worldwide each year. Recent technical advances in next-generation sequencing and bioinformatic analyses have greatly advanced the characterization of tumor genomes. Large-scale cancer genomics projects, e.g., the Therapeutically Applicable Research to Generate Effective Treatments (TARGET) for childhood cancers, The Cancer Genome Atlas (TCGA), and the International Cancer Genome Consortium (ICGC) for adult cancers, have accumulated a large amount of multi-dimensional genomic data for dozens of cancers. The primary aim in analyzing these unprecedented “big” genomic data is to identify “driver” mutation events related with tumor initiation and progression. Typically, driver genes are nominated by examining whether the non-synonymous mutation rate exceeds the background silent mutation rate.<sup>1,2</sup> However, identifying infrequently mutated driver genes requires a very large sample size to achieve statistical significance. A closely related challenge is to investigate relationships among mutated genes and to identify oncogenic pathways. Mutual exclusivity (ME) analysis is an effective computational approach that helps address both problems.

ME analysis was initially proposed for pairs of genes and has produced important findings that have been consistently replicated, e.g., ME between *EGFR* (MIM: 131550) and *KRAS* (MIM: 190070) in lung adenocarcinoma.<sup>3–5</sup> Because cancer pathways typically involve multiple genes, recent methods<sup>6–11</sup> have tried to extend pairwise analyses

to search for mutually exclusive gene sets (MEGS), which also has much better power than pairwise analyses. In brief, given a somatic mutation matrix for  $N$  subjects and  $M$  genes, we aim to identify “optimal” gene subsets that are mutually exclusively mutated.

Multiple methods have been proposed for ME analysis. Dendrix<sup>7</sup> and two other methods<sup>9,10</sup> use a “weight” statistic as the criterion to search for MEGS. However, this statistic is inappropriate to compare gene sets and tends to identify large MEGS with many false-positive genes, as we will show in simulations. MEMo<sup>6</sup> uses external biological data to form “cliques” (fully connected gene networks) and searches for MEGS within each clique to increase power by reducing multiple testing. As we will demonstrate, MEMo results in incorrect false-positive rates for each clique and tends to select MEGS with false-positive genes. Szczurek and Beerenwinkel<sup>8</sup> proposed a non-standard likelihood ratio test but ended up with a severely misspecified null distribution. Mutex<sup>11</sup> has improved existing methods and used permutations to control false-positive rates, but its overly simple statistic warrants further improvement. In summary, most of the existing methods fail to correctly control for false-positive rates and lack a criterion for selecting “optimal” MEGS. Because some of these MEGS methods have been widely used in tumor sequencing projects, previous results might need to be interpreted with caution.

Ideally, an analytic framework for identifying MEGS would have the following components. First, given a subset of  $m$  ( $m \leq M$ ) genes, a statistically powerful test is required to examine whether mutations in these  $m$  genes

<sup>1</sup>Division of Cancer Epidemiology and Genetics, National Cancer Institute, NIH, Bethesda, MD 20892, USA; <sup>2</sup>Center for Cancer Research, National Cancer Institute, NIH, Bethesda, MD 20892, USA

\*Correspondence: [jianxin.shi@nih.gov](mailto:jianxin.shi@nih.gov)

<http://dx.doi.org/10.1016/j.ajhg.2015.12.021>. ©2016 by The American Society of Human Genetics. All rights reserved.

show ME. Second, it is crucial to determine whether any subset of the  $M$  genes is statistically significant after adjusting for multiple testing. Third, a model selection criterion is required to compare nested gene sets to select the “optimal” MEGS. An inappropriate criterion can falsely include genes into MEGS or exclude true genes from MEGS.

We developed a framework that fits all above requirements. We developed a likelihood ratio test (LRT) for testing ME and performed a multiple-path linear search together with permutations to test the global null hypothesis, i.e., the set of  $M$  genes does not contain MEGS of any size. When global null hypothesis was rejected, we proposed a model selection procedure based on permutations to identify “optimal” MEGS. All algorithms have been implemented in an R package called MEGSA (mutually exclusive gene set analysis). Extensive simulations demonstrated that MEGSA outperformed existing methods for de novo discovery and dramatically improved the accuracy of recovering exact MEGS, particularly for imbalanced MEGS. MEGSA can be used either for de novo discovery or by incorporating existing biological datasets (e.g., KEGG pathways and protein-protein interactions) to improve statistical power by reducing multiple testing, in spirit similar to MEMo<sup>6</sup> and Mutex.<sup>11</sup> We can also use MEGSA to expand well-established small MEGS with further improved power.

We applied MEGSA to analyze the whole-exome sequencing data of 13 cancer types from TCGA. We identified multiple significant non-pairwise MEGS for breast cancer, low-grade glioma, uterine corpus endometrial carcinoma, skin cutaneous melanoma, head and neck squamous cell carcinoma, and acute myeloid leukemia with important biological implications. Incorporating KEGG pathway data further identified eight MEGS for breast cancer and ten for low-grade glioma. Although de novo discovery has lower power due to the high multiple testing burden, it has the potential to identify a more complete MEGS. Incorporating external information might identify significant but probably incomplete oncogenic pathways. Thus, MEGSA should be applied using these complimentary search strategies. We expect MEGSA to be useful for identifying oncogenic pathways and driver genes that would have been missed by frequency-based methods.

## Material and Methods

We consider a binary mutation matrix  $A$  with  $N$  rows (subjects with cancer) and  $M$  columns (genes), where each row represents the mutational status for one subject and each column for one gene (Figure 1A). Let  $a_{ik}$  denote the mutation status with  $a_{ik} = 1$  if gene  $k$  is somatically mutated for subject  $i$  and  $a_{ik} = 0$  otherwise. Here, a somatic mutation could be copy-number alternations, non-synonymous point mutations, or point mutations predicted to be deleterious. We consider non-synonymous point mutations in this manuscript. MEGSA has three components: (1) an efficient

likelihood ratio test (LRT) for examining mutual exclusivity for a subset of genes, (2) a multiple-path linear search algorithm and a permutation framework to evaluate the global null hypothesis (GNH), and (3) a model selection procedure to identify the “optimal” MEGS.

## A Likelihood Ratio Statistic for Testing Mutual Exclusivity

Given a subset of  $m$  ( $m \leq M$ ) genes and the binary mutation matrix (denoted as  $A_o$ , a sub matrix of  $A$ ), we describe a data generative model for MEGS. We assume that the  $m$  genes in the MEGS are completely mutually exclusive with coverage denoted as  $\gamma$ , defined as the proportion of samples covered by the MEGS. Within the MEGS, we assume  $(p_1, \dots, p_m)$  as the relative mutation frequencies with  $p_1 + \dots + p_m = 1$ . We assume that the observed mutation matrix  $A_o$  is generated in three steps (Figure 1B):

- (1) Given  $N$  subjects and coverage  $\gamma$ , we randomly sample  $n$  subjects covered by the MEGS according to the distribution  $Bionomial(N, \gamma)$ .
- (2) For each sampled subject covered by the MEGS, we randomly choose a “mutated” gene according to  $(p_1, \dots, p_m)$ .
- (3) Independent of the MEGS, we randomly simulate background mutations to each entry of matrix  $A_o$  with gene-specific background mutation rates  $\Pi = (\pi_1, \dots, \pi_m)$ . Here, background mutations refer to the mutations that do not belong to the MEGS.

Based on this data generative model and further assuming  $p_k \propto \pi_k$ , the log likelihood is given as

$$\log L(\gamma, \Pi; A_o) = \sum_{i=1}^N \log \left( (1 - \gamma) \prod_{k=1}^m \pi_k^{a_{ik}} (1 - \pi_k)^{1 - a_{ik}} + \gamma \frac{1}{\sum_{j=1}^m \pi_j} \sum_{k=1}^m \pi_k I_{\{a_{ik}=1\}} \prod_{j \neq k} \pi_j^{a_{ij}} (1 - \pi_j)^{1 - a_{ij}} \right).$$

Here,  $\gamma = 0$  corresponds to the null hypothesis that the  $m$  genes are randomly mutated.  $\Pi = (\pi_1, \dots, \pi_m)$  are nuisance parameters. LRT can be derived to test  $H_0: \gamma = 0$  versus  $H_1: \gamma > 0$ . Asymptotically, LRT has a null distribution  $0.5\chi_0^2 + 0.5\chi_1^2$ , a mixture distribution with 0.5 probability at point mass zero and 0.5 probability as  $\chi_1^2$ . See Appendix A for details.

## Testing the Global Null Hypothesis

Given a mutation matrix  $A$  with all  $M$  genes, it is crucial to test GNH that all genes are mutated independently. Suppose that we are interested in MEGS with no more than  $K$  genes. We have  $\sum_{k=2}^K \binom{M}{k}$  combinations of genes to be tested, which equals to  $2.0 \times 10^{11}$  if  $M = 100$  and  $K = 8$ . The multiple testing burden increases with size exponentially when  $K < M/2$ . Importantly, the total multiple testing burden is dominated by the largest MEGS with  $K$  genes. When  $M = 100$  and  $K = 8$ , the number of tests for MEGS with 8 genes account for 91.5% of total  $2.0 \times 10^{11}$  tests while such proportion is only  $8.0 \times 10^{-5}\%$  for MEGS of 3 genes. Intuitively, for the same nominal p value of  $10^{-6}$ , a MEGS with 3 genes should be much more significant than the one with 8 genes. Thus, putative MEGS of different sizes must be differentially treated. Moreover, the statistical tests can be highly correlated; thus the Bonferroni correction is too conservative. We propose a permutation-based procedure to address these problems (Figure 1C). Note

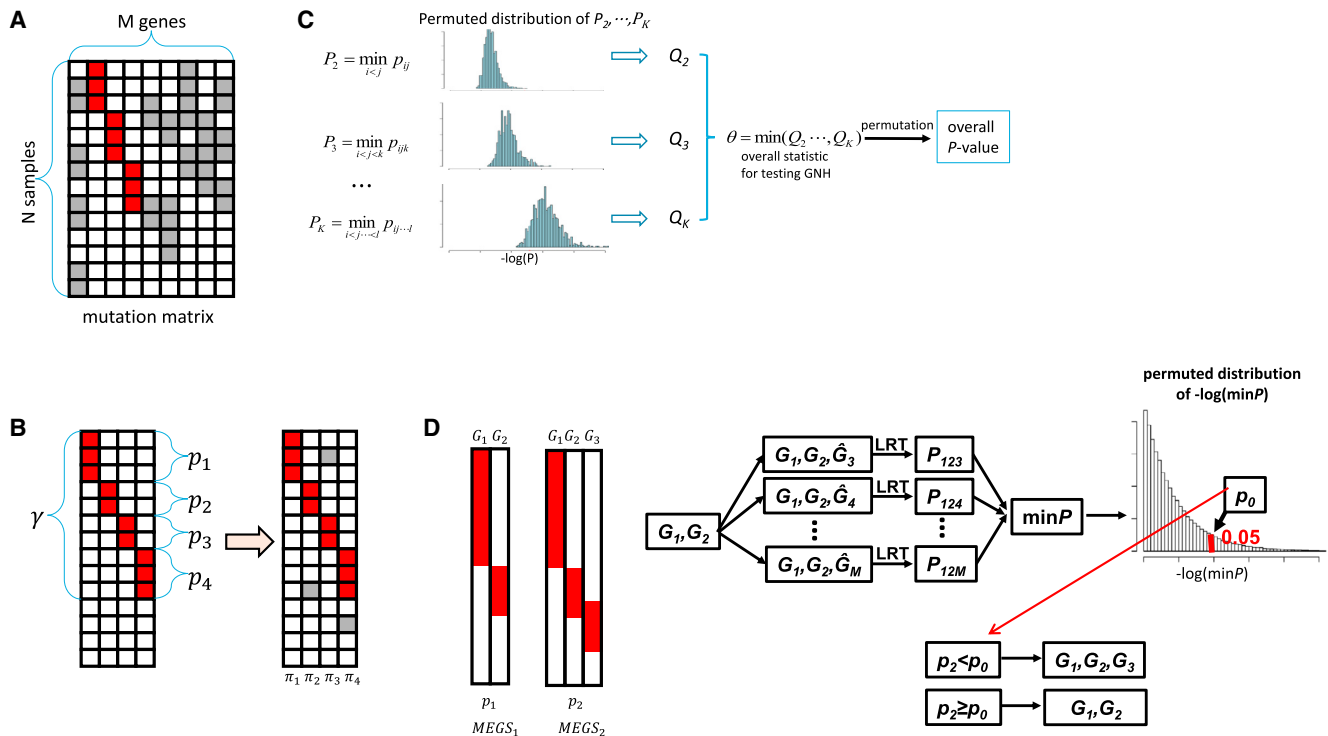

**Figure 1. Overview of the Algorithms Implemented in MEGSA for Searching Mutually Exclusive Gene Sets**

(A) Observed somatic mutation matrix. Each row is for one sample and each column for one gene. Red entries represent MEGS mutations and gray entries represent background mutations.

(B) A data generative model for MEGS. The left panel shows a MEGS with four genes showing complete mutual exclusivity. The right panel shows MEGS mutations and background mutations.  $\gamma$  is the coverage of the MEGS, defined as the proportion of samples covered by the MEGS.  $(p_1, \dots, p_m)$  are the relative mutation frequencies normalized to have  $p_1 + \dots + p_m = 1$ .  $(\pi_1, \dots, \pi_m)$  are the background mutation frequencies.

(C) Overall statistic for testing global null hypothesis and its significance.  $p_{ij}$  is the p value of our LRT for a gene pair  $(i, j)$ .  $p_{ijk}$  is the p value for a gene triplet  $(i, j, k)$ . For each  $k$ , let  $P_k$  as the minimum p value of all sets of  $k$  genes and evaluate its significance (denoted as  $Q_k$ ) using permutations preserving mutational frequencies. The overall statistic is defined as  $\theta = \min(Q_2, \dots, Q_K)$  and its significance is assessed by permutations.

(D) Model selection based on permutations. Two nested putative MEGS— $(G_1, G_2)$  and  $(G_1, G_2, G_3)$ —have nominal p value  $p_1$  and  $p_2$  based on LRT. We permute mutations in  $(G_3, \dots, G_M)$  by keeping the mutual exclusivity of  $(G_1, G_2)$  unchanged.  $\hat{G}_k$  represents permuted mutations for gene  $k$ . For each permutation, we calculate the minimum p value for all  $M-2$  triplets  $(G_1, G_2, \hat{G}_k)$ . Threshold  $p_0$  is chosen at level 5%.

that permutations were performed by preserving the mutation frequency for each gene.<sup>7,11</sup>

In brief, we first perform multiple test correction separately for MEGS of each size. For a given  $k$  ( $k \leq K$ ), we search all gene sets of size  $k$  to test for ME using our LRT and denote the minimum p value as  $P_k$ . The significance of  $P_k$  (denoted as  $Q_k$ ) is estimated by permutations. Because we search for MEGS of different sizes, the overall statistic for testing GNH is  $\theta = \min(Q_2, \dots, Q_K)$ , with significance evaluated by permutations. Finding the minimum p value  $P_k$  by exhaustive search is computationally challenging even for a moderate  $k$ . Thus, we implemented a multiple-path linear search algorithm to approximate  $P_k$  (Appendix A).

### Identifying Optimal Mutually Exclusive Gene Sets by Model Selection

When GNH is rejected, we can use the multiple-path linear search algorithm to identify all significant putative MEGS. These putative MEGS can be nested. Consider two significant putative MEGS: MEGS1 has two genes  $(G_1, G_2)$  with nominal p value  $p_1$  and MEGS2 has three genes  $(G_1, G_2, G_3)$  with nominal p value  $p_2$  based on LRT. Intuitively, if  $p_2 \ll p_1$ , we choose MEGS2 with three genes.

However, a simple criterion  $p_2 < p_1$  is too liberal and tends to include  $G_3$  into MEGS even if  $G_3$  is independent of  $(G_1, G_2)$ . This is because  $G_3$  is chosen from the  $M-2$  genes  $(G_3, \dots, G_M)$  to form the strongest MEGS with  $G_1$  and  $G_2$ .

We addressed the problem in a statistical testing framework (Figure 1D). The null hypothesis is that none of the  $M-2$  genes  $(G_3, \dots, G_M)$  is mutually exclusive of  $(G_1, G_2)$ . We reject the null hypothesis (and thus choose MEGS2) if  $p_2 < p_0$  with  $p_0$  chosen to control false-positive rate  $< 5\%$  based on permutations. Note that we keep the relationship between  $G_1$  and  $G_2$  unchanged and permute mutations only in  $(G_3, \dots, G_M)$ . If  $(G_3, \dots, G_M)$  are independent of  $(G_1, G_2)$ , using  $p_0$  as threshold will correctly choose MEGS1 with probability 95%.

### Identifying Mutually Exclusive Gene Sets by Three Search Strategies

We propose three complimentary strategies for searching MEGS via MEGSA, as illustrated in Figure 2. The first strategy is de novo discovery by directly applying MEGSA to all  $M$  genes (Figure 2A). The advantage of de novo discovery is that it does not rely on any prior information and has the potential to identify

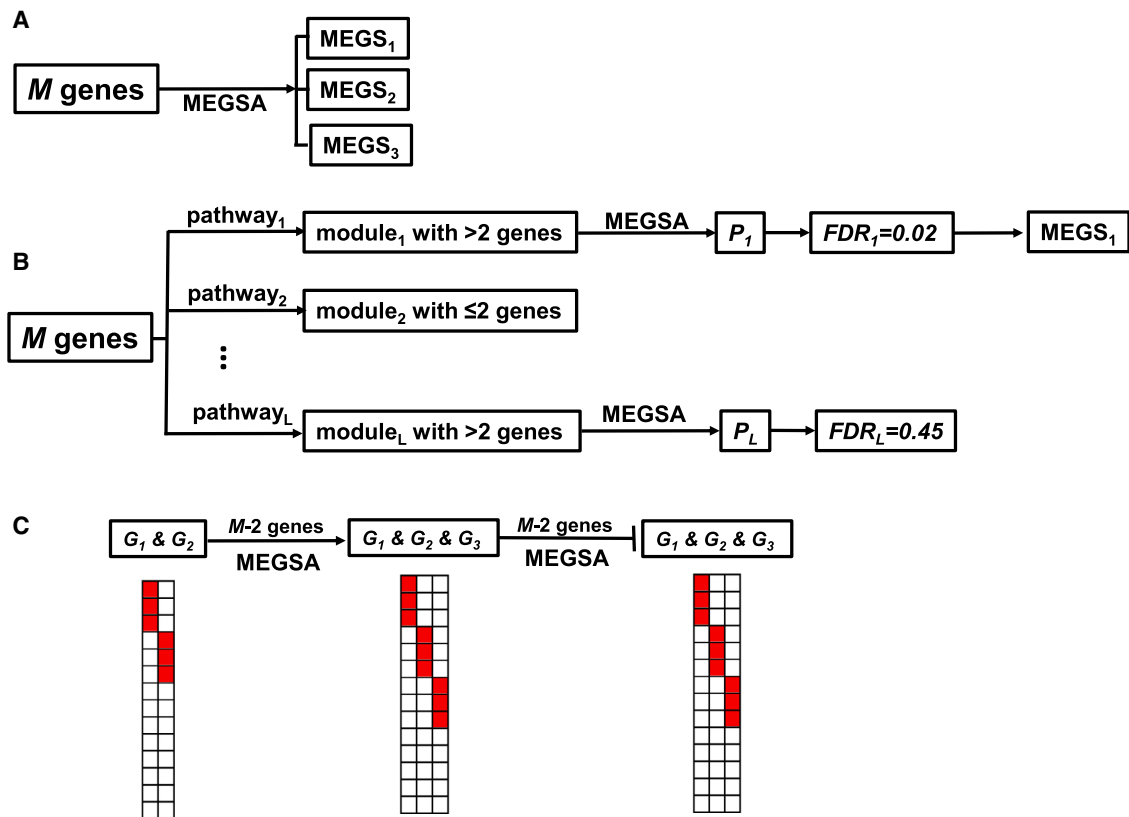

**Figure 2. Three Strategies for Searching Mutually Exclusive Gene Sets via MEGSA**

(A) De novo analyses for all  $M$  genes.

(B) Search MEGS by incorporating KEGG pathways. For each pathway, we derive the subset (called a module) of  $M$  genes (with mutation data) in the pathway. We eliminate duplicate modules or modules with fewer than three genes and analyze each module via MEGSA to derive module-wise  $p$  values. We control  $FDR < 0.05$  using these module-wise  $p$  values to choose significant modules and identify optimal MEGS.

(C) Expanding established small MEGS ( $G_1, G_2$ ) by the model selection procedure described in Figure 1D.

a complete MEGS. However, de novo analyses might have low power because of heavy multiple testing burden.

MEGSA can also be applied by incorporating existing biological data, in spirit similar to MEMo<sup>6</sup> and Mutex.<sup>11</sup> MEMo searches for fully connected sub graphs (called “cliques”) using existing pathway and functional information (e.g., protein-protein interaction and gene coexpression) and analyzes each clique. Mutex restricts search space so that genes in MEGS have a common downstream signaling target. Although MEGSA can be modified to perform similar search, we exemplify this approach by using the KEGG pathway database (Figure 2B). In brief, we compare  $M$  genes with KEGG pathways and identify subsets (called modules) with more than two genes. We analyze each module using MEGSA and produce an overall  $p$  value. We choose significant modules by controlling FDR at 5%.

The third strategy is to search MEGS starting with a well-established small MEGS (e.g., *EGFR* and *KRAS* in lung cancer). We use our model selection procedure (Figure 1D) to “grow” the MEGS until no gene can be included (Figure 2C).

## Results

### Type I Error Rate and Power Behavior of LRT

Because the LRT is the foundation for our algorithm, we first evaluated its type I error rate and the power behavior

for a fixed set of  $m$  genes. Under  $H_0$ ,  $LRT \sim 0.5\chi_0^2 + 0.5\chi_1^2$  asymptotically. Results based on 100,000 simulations verified that the  $p$  values calculated based on the asymptotic distribution agreed well with the simulation-based  $p$  values (Table S1) for different combinations of parameters, including background mutation rate, sample size, and the size of gene sets. The power of LRT increases with sample size and coverage and reduces with background mutation rates (Figure S1).

### Comparison with Other Methods that Detect Mutually Exclusive Gene Mutations via Simulations

We compared the performance of MEGSA with the performances of existing methods including RME,<sup>12</sup> MEMo,<sup>6</sup> Dendrix,<sup>7</sup> LRT-SB,<sup>8</sup> and Mutex.<sup>11</sup> MDPFinder<sup>9</sup> uses the same “weight” statistic as Dendrix but a more efficient computational method for searching MEGS; thus the comparative study does not include MDPFinder. A systematic comparison is very difficult for following reasons. Dendrix, RME, and LRT-SB perform de novo analyses; MEMo uses existing biological data to reduce the search space; and MEGSA and Mutex can perform both analyses. In addition, for RME, Dendrix, and LRT-SB, it is unclear



how multiple testing was corrected. Mutex<sup>11</sup> compared the performances using receiver operating characteristic (ROC) analysis, but it is unclear how false positives and false negatives were calculated. A more detailed summary and critique of these methods can be found in the [Supplemental Note](#).

We empirically evaluated the null distribution of LRT-SB.<sup>8</sup> Simulation results show that the empirical distribution of LRT-SB deviates dramatically from the claimed null distribution  $N(0,1)$  ([Figure S2](#); see also the theoretical explanation in [Supplemental Note](#)). MEMo derives a p value for each “clique” and selects significant cliques by controlling FDR using these p values. Controlling FDR requires p values for null statistics to follow a uniform distribution  $U[0,1]$ .<sup>13</sup> However, our simulation results (under  $H_0$ ) show that the p values dramatically deviate from the uniform distribution  $U[0,1]$  ([Figure S3](#)), suggesting that MEMo has incorrect false-positive rates. In addition, MEMo does not select “optimal” MEGS sets appropriately and typically includes many false positives ([Figure S4](#) and [Supplemental Note](#)). Therefore, we excluded LRT-SB and MEMo from the comparison.

In the first set of simulations, we simulated a mutation matrix for 54 genes in 500 samples. Among the 54 genes, mutations in 50 genes were randomly distributed. The 50 genes were classified into five groups; each group had 10 genes with mutation frequencies 1%, 5%, 10%, 20%, or 30%. The simulated MEGS had four genes. The background mutation rates for these four genes were set as 1%. We simulated two types of MEGS ([Figure 3A](#)). One had balanced mutation frequencies, i.e., all four genes in MEGS were mutated with the same frequency. The other had imbalanced mutation frequencies with ratio 3:1:1:1. Comparison was based on de novo analyses. The maximum size of MEGS was set as eight. The simulation results for MEGS with three genes are reported in [Figure S5](#).

We first compared the performance of these methods as a “scoring” method without considering the statistical significance. Therefore, we calculated the probability of choosing the true MEGS identified as the top candidate for each method. Simulation results show that MEGSA performs the best for all simulations and greatly improves existing methods particularly for imbalanced MEGS ([Figure 3B](#)). Of note, the performances are heavily impacted by the coverage of the MEGS for all methods. Dendrix has the worst performance and cannot identify the true MEGS even when the coverage is high. RME performs poorly for low-coverage MEGS but reasonably well when coverage increases to 60% for balanced MEGS. Mutex outperforms RME and Dendrix.

Among Dendrix, RME, Mutex, and MEGSA, only Mutex and MEGSA performed permutations to accurately evaluate overall significance (either family-wise error rate or FDR). Therefore, we compared the performance of these two methods for statistically significant findings. For MEGSA, a significant finding was identified if its multiple testing corrected p value  $< 0.05$ . For Mutex, a significant

finding was identified if  $FDR < 0.05$ . A simulation was considered successful if the detected top MEGS involved any pair of the four genes in the simulated MEGS. The power is calculated as the proportion of “successful” simulations ([Figure 3C](#)). A much more rigorous criterion required that the top MEGS was statistically significant and identical to the simulated MEGS ([Figure 3D](#)). We also calculated the average number of correctly identified genes (out of four) and number of falsely identified genes ([Figure S6](#)). MEGSA outperforms Mutex in all comparisons. Importantly, the performance of MEGSA is superior to that of Mutex for imbalanced MEGS, which are much more frequent than balanced MEGS in real data.

Although the three methods (RME, Mutex, and MEGSA) have different performances, the probability of choosing the exact MEGS increases to one when sample sizes increase to infinity, an important statistical property called “consistency.” However, the widely used Dendrix algorithm does not have this property and tends to include many false-positive genes (see [Supplemental Note](#) for explanation). Here, we report more detailed simulation results for Dendrix, investigating the false positives in the selected top candidate. [Figure 3E](#) reports the probability of choosing each gene based on 1,000 simulations assuming coverage  $\gamma = 40\%$  (top) and  $\gamma = 60\%$  (bottom). [Figure 3F](#) reports the distribution of the number of selected false-positive genes. For example, when coverage  $\gamma = 40\%$ , in about 30% of simulations, Dendrix’s top candidate includes four false-positive genes. For low-coverage MEGS with  $\gamma = 40\%$ , Dendrix chooses too many false positives, mostly in highly mutated genes (frequency  $\pi = 30\%$ ) and lowly mutated genes (frequency  $\pi = 1\%$ ). When coverage increases to 60%, Dendrix identified almost all genes in MEGS but still included many false-positive genes. These simulation results suggest that a high-coverage MEGS identified by Dendrix might include multiple false-positive genes. Thus, MEGS identified by Dendrix might need to be interpreted with caution. Encouragingly, MEGSA has consistently high sensitivity and low false-positive rates.

In the second set of simulations, we performed simulations using the breast cancer tumor sequencing data with 989 samples from The Cancer Genome Atlas (TCGA). Our simulations were based on 39 driver genes reported in the TumorPortal website. As we will show in next section, *TP53*, *CDH1*, *GATA3*, and *MAP3K1* were detected as a highly significant MEGS for breast cancer with estimated coverage  $\hat{\gamma} = 0.547$ ,  $(\hat{\pi}_1, \hat{\pi}_2, \hat{\pi}_3, \hat{\pi}_4) = (0.071, 0.024, 0.023, 0.015)$  and  $(\hat{p}_1, \hat{p}_2, \hat{p}_3, \hat{p}_4) = (0.534, 0.180, 0.173, 0.113)$ . In each simulation, we simulated MEGS mutation data with four genes (*TP53*, *CDH1*, *GATA3*, *MAP3K1*) according to the estimated parameters and randomly permuted the mutations across subjects for the remaining 35 genes to generate background mutations for these genes. We performed 1,000 simulations to evaluate the performance. RME could not converge to produce results possibly because of multiple genes with low

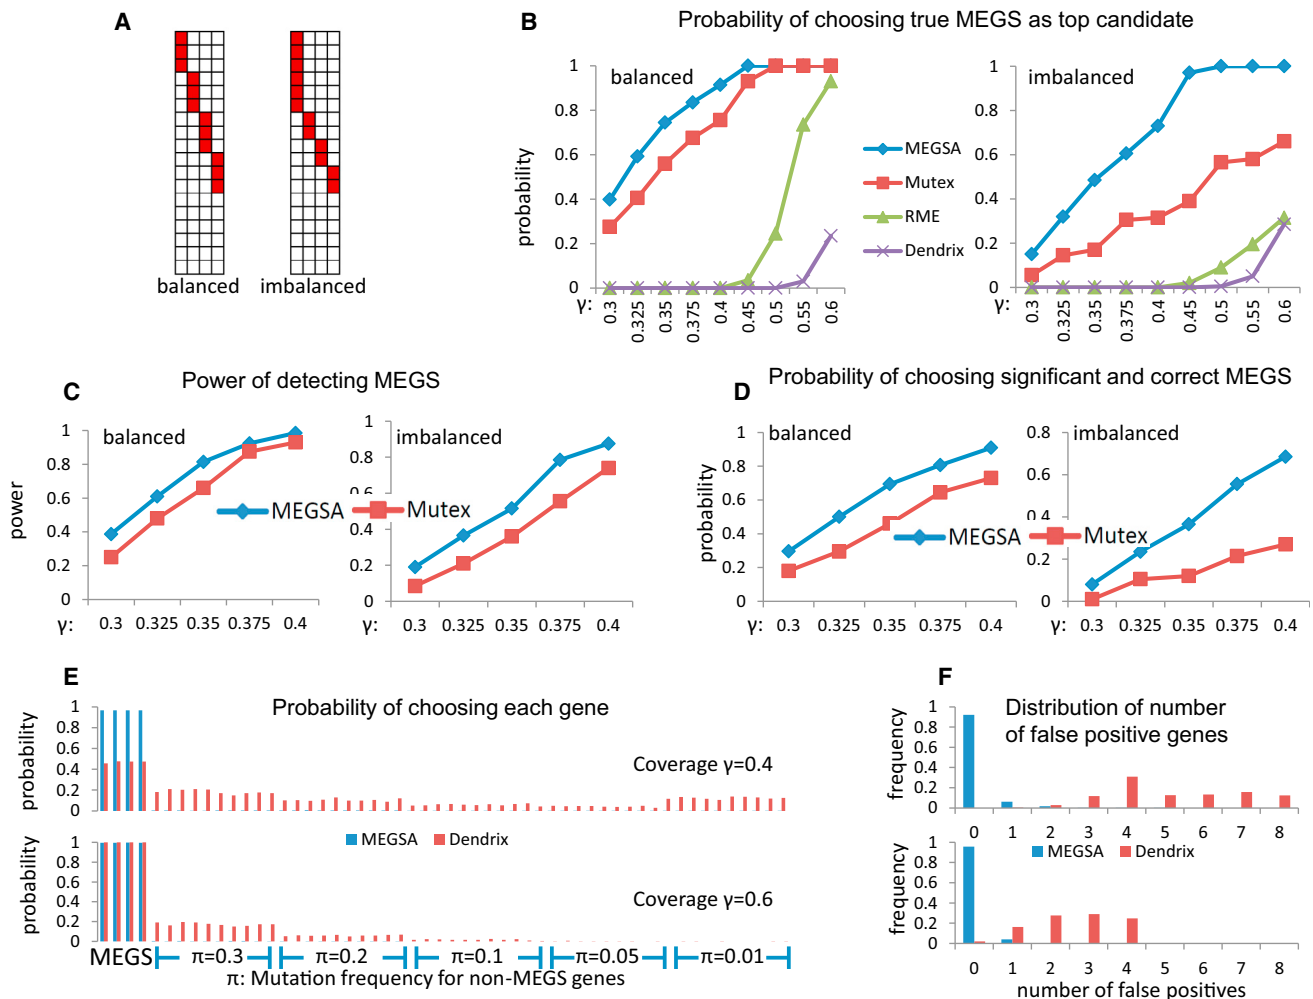

**Figure 3. Performance Comparison of Methods for Detecting Mutually Exclusive Gene Sets on Simulated Datasets**

In all simulations, we have 54 genes with 50 being randomly simulated with specific mutation frequencies and 4 genes as MEGS.

(A) Balanced and imbalanced MEGS with four genes. In imbalanced MEGS, the mutational frequencies have a ratio 3:1:1:1.

(B) Probability of ranking the exact MEGS as the top candidate. The X-coordinate is the coverage ( $\gamma$ ) of simulated MEGS.

(C) Power of detecting MEGS via MEGSA and Mutex.

(D) Probability that the identified top MEGS is statistically significant and identical to the true MEGS. Coverage ( $\gamma$ ) of MEGS ranges from 0.3 to 0.4.

(E) Probability of choosing each gene in the identified top MEGS by MEGSA and Dendrix. The top figure is based on a MEGS with coverage  $\gamma = 0.4$  and the bottom figure based on coverage  $\gamma = 0.6$ .  $\pi$  is the mutation frequencies for the 50 non-MEGS genes. The first four are MEGS genes and the rest are non-MEGS genes.

(F) The distribution of the number of falsely detected genes for the top MEGS identified by in MEGSA and Dendrix. MEGSA had few false-positive genes whereas Dendrix detected many false-positive genes.

mutation frequencies. Thus, we compared the performance for Dendrix, Mutex, and MEGSA. Dendrix included many false-positive genes (mean of 2.8 false-positive genes per simulations) and chose the true MEGS as the top candidate in only 2% of simulations. Both Mutex and MEGSA had low false-positive rates, including mean of 0.06 and 0 false-positive genes in each simulation, respectively. MEGSA correctly chose the true MEGS as the top candidate in 93.4% simulations, and Mutex chose the true MEGS as the top candidate in 33.2% simulations. Further investigation showed that Mutex missed one gene in 44.1% simulations and two genes in 22.7% simulations. This set of simulations based on realistic settings confirmed previous

simulation results that MEGSA had a better performance for detecting the exact MEGS.

In the third set of simulations, we investigated the power performance of MEGSA when input genes can be partitioned into  $L$  modules of equal sizes by incorporating pathway information. MEGSA was applied separately to each module to generate a module-wise p value. A module was statistically significant if its p value  $< 0.05/L$  based on the Bonferroni correction. Under the assumption that the true MEGS is completely contained in one of the modules, the power of detecting MEGS can be substantially improved compared to de novo analysis that simultaneously analyzes all genes (Figure S7).

### Analysis of TCGA Mutation Data

We analyzed non-synonymous point somatic mutations identified by whole-exome sequencing for 13 cancers in TCGA with data downloaded from the data portal. For cancer types included in the TumorPortal website, we included candidate driver genes reported by the website<sup>14</sup> using MutSigCV.<sup>1</sup> Brain low-grade glioma (LGG) is not reported in the TumorPortal website. Therefore we identified candidate driver genes using MutSigCV<sup>1</sup> and included these genes into analysis. Sample sizes, numbers of selected genes, and mutational frequencies are summarized in [Tables S2](#) and [S3](#). For each cancer type, we performed de novo analysis followed by the secondary analysis incorporating KEGG pathways. For de novo analysis, gene sets were considered statistically significant if  $p < 0.05$  after multiple testing based on 10,000 permutations. For KEGG-guided analysis, we derived a module-wise  $p$  value for each module and declared significance by controlling FDR  $< 0.05$ . Note that MEGS from pathway-guided analyses were discarded if they were a subset of any MEGS identified in de novo analyses.

De novo analyses identified non-pairwise MEGS for acute myeloid leukemia (LAML), LGG, breast invasive carcinoma (BRCA), skin cutaneous melanoma (SKCM), head and neck squamous cell carcinoma (HNSC), and uterine corpus endometrial carcinoma (UCEC). For other cancer types, de novo analysis identified only pairwise MEGS. Here, we report detailed results for BRCA and LAML. The complete results are summarized in [Table S4](#).

We also performed de novo analysis using RME, Dendrix, and Mutex with results summarized in [Table S5](#) and [Figure S8](#). Because we lack the gold standard for accurate comparison, we here briefly describe the putative similarities and differences in the results produced from these algorithms. When there existed strong MEGS with high coverage, e.g., *AKT1* (MIM: 164730), *PTEN* (MIM: 601728), and *TP53* (MIM: 191170) with coverage 91.9% in UCEC and *BRAF* (MIM: 164757), *KIT* (MIM: 164920), and *NRAS* (MIM: 164790) with coverage 83.7% in SKCM, Dendrix detected these MEGS with results consistent with Mutex and MEGSA. However, when there were no strong MEGS with high coverage, Dendrix selected a large gene set as the top candidate, e.g., it chose a set of eight genes (the maximum number of genes we allowed in analysis) as the top candidate for BRCA, GBM, KIRC, and LAML. According to simulations, some of the genes from these large putative MEGS might be false positives. RME detected 25 MEGS; however, only two MEGS (pairwise) were identical to those identified by Mutex or MEGSA and the majority of them did not overlap with those by Mutex or MEGSA. The mutation data did not seem to support the large MEGS identified by RME. MEGSA and Mutex produced the most similar results among the four algorithms and detected 42 and 34 significant MEGS in total, respectively. Among the 34 significant MEGS detected by Mutex, 14 were identical to those identified by MEGSA, 11 were subsets of those in MEGSA, and 7 overlapped

with those in MEGSA for at least two genes. Mutex frequently identified multiple subsets of one MEGS identified by MEGSA. For example, MEGSA detected *EGFR*, *IDH1* (MIM: 147700), *IDH2* (MIM: 147650), and *NF1* (MIM: 162200) whereas Mutex detected two subsets: *EGFR*, *IDH1*, and *IDH2* and *IDH1*, *IDH2*, and *NF1*. These results together with the simulation results suggest that MEGSA might have a better performance for identifying a more complete oncogenic pathway. Mutex tends to select smaller MEGS, consistent with its algorithm that considers the weakest mutual exclusivity when scoring a putative MEGS.

### Analysis Results for BRCA

De novo analyses identified 10 significant but overlapping MEGS for BRCA with 989 subjects. These MEGS involved 11 genes with *TP53* involved in all MEGS ([Figure 4A](#)). We identified five MEGS with  $p < 10^{-4}$  ([Figure 4B](#)). These MEGS were not reported by the TCGA breast cancer article<sup>15</sup> using MEMo<sup>6</sup> that relies on functional data, emphasizing the necessity of de novo search.

The most significant MEGS has four genes—*TP53*, *CDH1* (MIM: 192090), *GATA3* (MIM: 131320), and *MAP3K1* (MIM: 600982)—and covers 59.6% of subjects. E-cadherin, encoded by *CDH1*, is important in epithelial-mesenchymal transition (EMT). Moreover, *GATA3*, p53, and *MAP3K1* are related to the expression of *CDH1*. Loss of p53 represses E-cadherin expression in vitro as a result of *CDH1* promoter methylation;<sup>16</sup> *GATA3* expression is correlated with E-cadherin levels in breast cancer cells;<sup>17</sup> and E-cadherin expression can be repressed by Snail/Slug after activation by the MAPK/ERK pathway.<sup>17</sup>

The largest MEGS ( $p = 0.022$ ) has five genes—*TP53*, *AKT1*, *ARID1A* (MIM: 603024), *MED23* (MIM: 605042), and *TBL1XR1* (MIM: 608628)—covering 40.4% of subjects ([Figures 4C](#) and [4D](#)). Of note, this MEGS is extremely imbalanced: all genes except *TP53* are infrequently mutated with frequency 1%–2% and could not be identified by other methods, consistent with the results of simulations. *TBL1XR1* belongs to and regulates the core transcription repressor complexes NCoR/SMRT,<sup>18</sup> and p53 gene targets might be regulated by the SMRT in vitro in response to DNA damage.<sup>19</sup> *ARID1A* encodes BAF250a, a component of the SWI/SNF chromatin-remodeling complex that directly interacts with p53.<sup>20–23</sup> Therefore, loss of *ARID1A* might have a similar effect as p53 deficiency. The mutual exclusivity between *MED23* and other genes have not been reported previously. *MED23* is a subunit of the mediator complex, a key regulator of gene expression, and is required for Sp1 and ELK1-dependent transcriptional activation in response to activated Ras signaling.<sup>24–27</sup> *MED1* and *MED17* directly interact with p53,<sup>27</sup> suggesting a possible connection between p53 and *MED23* via the mediator complex. Also, *MED23* interacts directly with the transcription factor ESX/ELF3,<sup>27</sup> which is downstream of *AKT1* in the PI3K pathway. ESX-dependent transcription after activation by *AKT1* is key for cell

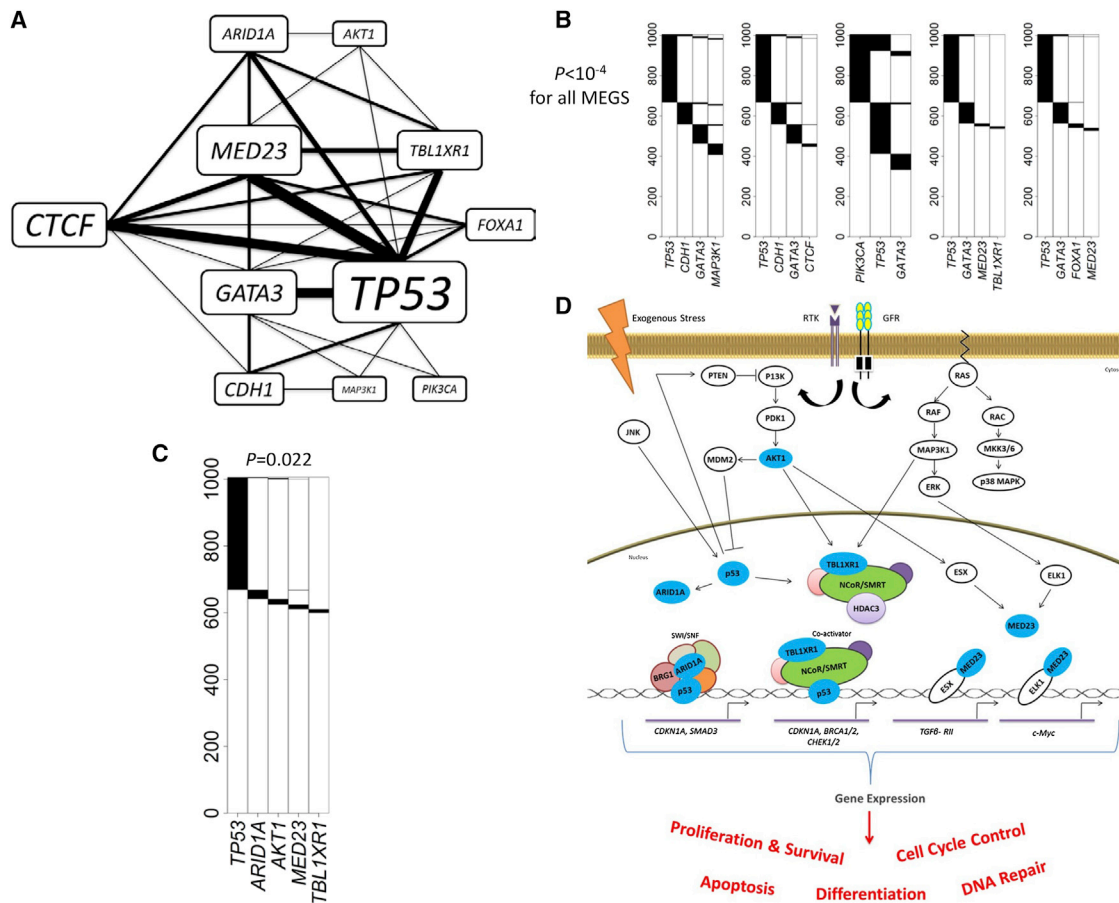

**Figure 4. Analysis Results for TCGA Breast Cancer Whole-Exome Sequencing Data**

p values were adjusted for multiple testing for all reported MEGs.

(A) A network constructed based on the ten significant MEGs. Thickness of the edges and sizes of the gene labels are proportional to the times in the detected MEGs.

(B) Five significant MEGs with  $p < 10^{-4}$ .

(C) A significant MEGs with five genes.

(D) Illustration showing MEGs pattern including protein products (colored blue) of *AKT1*, *TP53*, *ARID1A*, *MED23*, and *TBL1XR1* in their relevant biological pathways. Connections including activation and interaction as well as effects on gene expression and biological processes are indicated. Components in the NCoR/SMRT and SWI/SNF complexes and the potential interaction of *MED23* with *p53* via the overall mediator complex are not illustrated. Connections including activation (lines with arrow) and inhibition (bar-headed lines) as well as end biological effects between the gene products are illustrated. Abbreviations are as follows: RTK, receptor tyrosine kinases; GFR, growth factor receptor.

proliferation and survival. In summary, these genes have key roles in chromatin remodeling (*TBL1XR1* and *ARID1A*), gene expression regulation (*MED23* and *TP53*), and signaling (*AKT1*), and probably regulate a common set of gene targets downstream of the p53, PI3K, and MAPK/ERK signaling pathways that are important for cell cycle control, survival, and proliferation.

Importantly, these infrequently mutated genes are unlikely to achieve high statistical significance via frequency-based driver gene test, e.g., MutSigCV.<sup>1</sup> In fact, in the TCGA breast cancer article,<sup>15</sup> *MED23* and *ARID1A* were not reported as significantly mutated whereas *FOXA1* (MIM: 602294) and *CTCF* (MIM: 604167) were reported only as “near significance.” Because MutSigCV is highly sensitive to the choice of “Bagle” gene set for estimating the silent mutation rate, a very large sample size is required to replicate these findings. Given that *TP53* is

a well-established driver gene, the observed mutual exclusivity provides strong and independent evidence for establishing these genes’ role as drivers.

Pathway-guided analysis identified eight MEGs that were not detected by de novo analyses. Interestingly, we found that *CBFB* (MIM: 121360) was mutually exclusive of *ARID1A*, *MED23*, and *TP53*. As described above, p53 can interact with *ARID1A* in the SWI/SNF chromatin remodeling complex via BRG1 (see Figure 4D for SWI/SNF complex). The transcriptional coactivator *CBFB* is known to interact with the tumor-suppressor *RUNX1*, the predominant *RUNX* family member in breast epithelial cells.<sup>28</sup> *RUNX1* interacts with SWI/SNF via BRG1<sup>29</sup> and can act as transcriptional coactivator for p53 in response to DNA damage.<sup>30</sup> Thus, we propose that the loss of either one of these genes would be sufficient to lead to abnormal SWI/SNF complexes and dysregulation



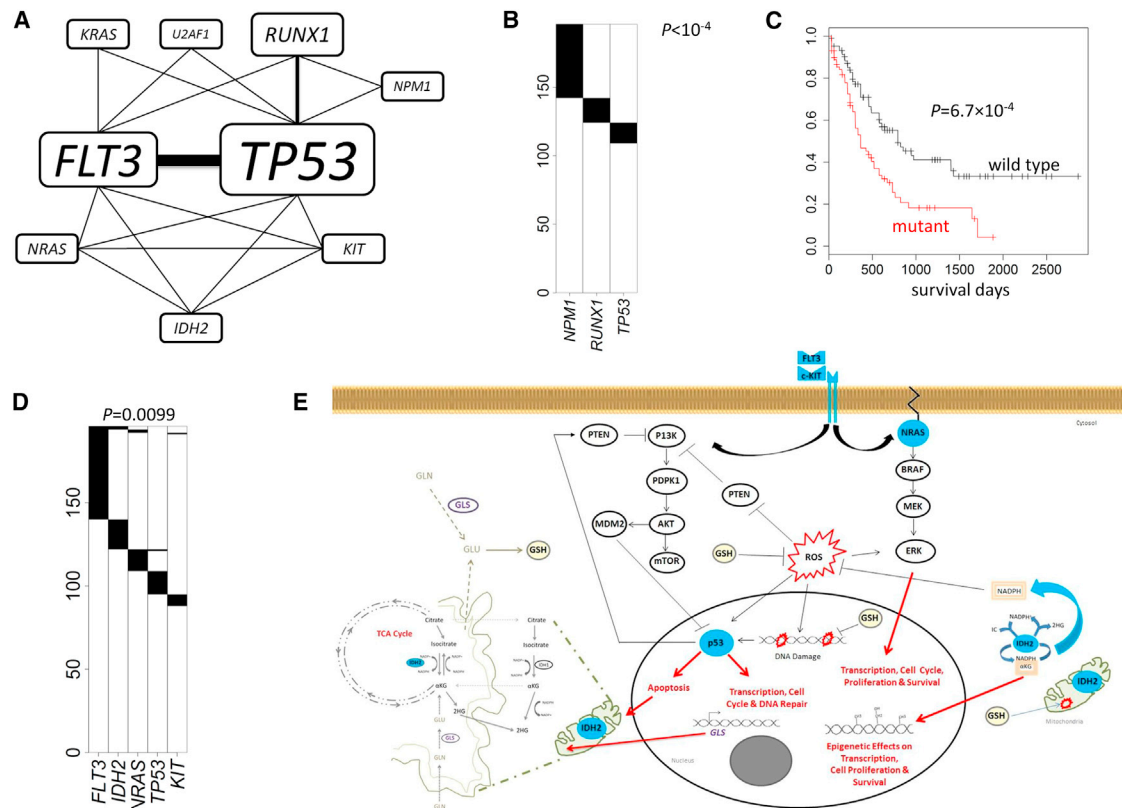

**Figure 5. Analysis Results for TCGA Acute Myeloid Leukemia Whole-Exome Sequencing Data**

p values were adjusted for multiple testing for all reported MEGS.

(A) A network constructed based on the five significant MEGS. Thickness of the edges and sizes of the gene labels are proportional to the times in the detected MEGS.

(B) The most significant MEGS with three genes: *NPM1*, *RUNX1*, and *TP53*.

(C) The mutation status of the triplet (*NPM1*, *RUNX1*, and *TP53*) is strongly associated with survival.

(D) A significant MEGS with five genes.

(E) Illustration showing MEGS pattern including protein products (colored blue) of *FLT3*, *IDH2*, *KIT*, *NRAS*, and *TP53* in their relevant biological pathways. Connections including activation (lines with arrow) and inhibition (bar-headed lines) as well as end biological effects between the gene products are indicated. *IDH2*, which locates to the mitochondria, is shown outside (or in-part) of the illustrated organelle for clarity and only the relevant components of glutamine (GLN) and glutathione (GSH) metabolism and TCA cycle are indicated. PI3K pathway (receptor tyrosine kinases [RTK], *FLT3*, and *KIT*), MAPK/ERK pathway (*NRAS*). Abbreviations are as follows: ROS, reactive oxygen species;  $\alpha$ KG, alpha-ketoglutarate; 2HG, 2-hydroxyglutarate; TCA, tricarboxylic acid cycle; GLN, glutamine; GLU, glutamate; and GLS, glutaminase 2; GSH (glutathione).

of chromatin-related epigenetics and gene expression, leading to inhibition of apoptosis.

Breast cancer is highly heterogeneous with only two genes—*TP53* and *PIK3CA* (MIM: 171834)—with mutation frequencies greater than 15% (Table S3). The majority of genes have mutation frequencies around 1%–2%, making it difficult to identify MEGS. We successfully identified ten significant MEGS based on de novo analyses and additional eight guided by KEGG pathways. Other biological databases, e.g., functional data and Human Reference Network in MEMo<sup>6</sup> or the common downstream target database in Mutex,<sup>11</sup> could be used in the future to guide the search of MEGS.

#### Analysis Results for LAML

Compared with other cancer types, AML genomes have the lowest somatic mutation rates,<sup>1</sup> with only 13 mutations in coding regions in average. Such a low overall

(and also background) mutation rate suggests a good statistical power even with a small sample size according to our simulations (Figure S1). In fact, de novo analyses identified five distinct but overlapping significant MEGS. These significant MEGS involve nine genes with *TP53* and *FLT3* (MIM: 136351) shared by four MEGS (Figure 5A). The pathway-guided search did not detect additional MEGS.

The most significant MEGS (Figure 5B) has three genes—*NPM1* (MIM: 164040), *RUNX1* (MIM: 151385), and *TP53* ( $p < 10^{-4}$ )—which is a subset of the top MEGS (four genes and four fusions) reported by the TCGA LAML article.<sup>31</sup> We further tested the association of the mutations in these three genes and their combinations with survival, adjusting for age, stage, and gender. Strikingly, the strongest association was detected for the MEGS ( $p = 6.7 \times 10^{-4}$ ; Figure 5C) but not any subset ( $P_{TP53} = 0.002$ ,  $P_{NPM1} = 0.13$ ,  $P_{RUNX1} = 0.24$ ,

$P_{TP53/NPM1} = 0.0034$ ,  $P_{TP53/RUNX1} = 0.0032$ , and  $P_{RUNX1/NPM1} = 0.042$ ), suggesting the usefulness of the MEGS for predicting clinical outcomes. Note that in the LAML article, the top MEGS included *CEBPA* (MIM: 116897), which had 3 (out of 13) mutations co-occurring with the triplet. In fact, including *CEBPA* into the triplet lowered the LRT statistic from 25.1 to 22.7. Thus, our model selection procedure excluded *CEBPA*. Moreover, including *CEBPA* did not significantly improve the prediction of survival ( $p = 5.9 \times 10^{-4}$  with *CEBPA* versus  $p = 6.7 \times 10^{-4}$  without *CEBPA*). These results suggest that the mutual exclusivity between *CEBPA* and other genes is at least suspicious and requires independent replication.

The largest MEGS (Figure 5D) has five genes—*FLT3*, *IDH2*, *KIT*, *NRAS*, and *TP53* ( $p = 0.0099$ )—covering 55.1% of subjects. This MEGS was not reported by the TCGA LAML article<sup>31</sup> and was not detected by other algorithms. Figure 5E describes important connections between function/pathways for the five gene products, suggesting biological plausibility. *FLT3* and *KIT* encode receptor tyrosine kinases upstream of the PI3K and MAPK/ERK signaling pathways, and *NRAS* is also part of MAPK/ERK. Mutations activating these pathways or inactivating *TP53* are common mechanisms that cancer cells use to proliferate and escape apoptosis.<sup>32</sup>

Interestingly, we discovered that *IDH2* belongs to this MEGS. *IDH2* encodes a mitochondrial enzyme that converts isocitrate to  $\alpha$ -ketoglutarate ( $\alpha$ KG) in the tricarboxylic acid cycle and in this process produces the antioxidant nicotinamide adenine dinucleotide phosphate (NADPH), which is necessary to combat oxidative damage/stress.<sup>33,34</sup> Mutant *IDH2* is predicted to result in depletion of  $\alpha$ -KG, a decrease in NADPH, and production of 2-hydroxyglutarate (2-HG) and might elevate cytosolic reactive oxygen species (ROS).<sup>35</sup> Mutant *IDH2* can result in epigenetic effects on gene transcription (including DNA hypermethylation and histone demethylation), whereas loss of p53 function can result in increased expression of DNA methyltransferase 1 (DNMT1).<sup>16,36</sup> Thus, a reasonable explanation for the observed mutual exclusivity between *TP53* and *IDH2* is that the loss of either protein activity can result in similar aberrant gene methylation patterns across the genome and dysregulated gene expression. We also suggest a further novel hypothesis. Depleted  $\alpha$ -KG levels in *IDH2* mutant cells might be replenished by the conversion of glutamate to  $\alpha$ -KG in the mitochondria.<sup>37</sup> The provision of glutamate in the mitochondria is regulated by p53 via expression of the enzyme glutaminase (GLS), which also regulates antioxidant defense function in cells by increasing reduced glutathione (GSH) levels.<sup>38</sup> Thus, *IDH2* and *TP53* mutations are mutually exclusive because loss of both genes (or gene activity) would not be conducive to tumorigenesis or survival as a result of further depletion of  $\alpha$ KG levels in the mitochondria and DNA damage caused by high levels of ROS. The mutual exclusivity between *IDH2* mutation and *FLT3*, *KIT*, and *NRAS*

is also biologically plausible. Mutant *IDH2* might also be linked to the activation of RAS/ERK and the PI3K pathways via ROSS, which can act as potent mitogens when apoptosis is inhibited.<sup>39</sup> Elevated ROS levels can activate ERKs, JNKs, or p38 and reversibly inactivated PTEN.<sup>40,41</sup> Thus, *IDH2* mutation might be sufficient to exclusively deregulate cell proliferation and survival processes important for AML development.

## Discussion

We developed a powerful and flexible framework, MEGSA, for identifying mutually exclusive gene sets (MEGS). MEGSA outperforms existing methods for de novo analyses and greatly improves the capability of recovering the exact MEGS, particularly for highly imbalanced MEGS. The key components of MEGSA are a likelihood ratio test and a model selection procedure. Because likelihood ratio test is asymptotically most powerful, MEGSA is expected to be nearly optimal for de novo search. Our algorithms can be easily adapted to other methods that integrate with external information, e.g., MEMo and Mutex, to improve performance. As an important contribution, we carefully examined the performance of existing methods. We concluded that many methods had incorrect false-positive rates and poor performance for selecting optimal MEGS. Importantly, mutual exclusivity analysis might help identify infrequently mutated driver genes, as we demonstrated in the TCGA BRCA data. CoMet<sup>42</sup> was recently published for identifying MEGS using the approximate p value of an exact test as the scoring criterion. CoMet has to specify the size of MEGS and it is not clear how CoMet compares nested putative MEGS models to select the optimal one.

MEGSA can be further improved in several ways. First, MEGSA does not consider the extremely variable somatic mutation rates across subjects. Including subjects with very high mutation rate might increase the background mutation rate and thus decrease the statistical power. We are currently extending MEGSA by modeling subject-specific background mutation rates. Second, MEGSA uses a multiple-path search algorithm for computational consideration and might miss findings. The Markov Chain Monte Carlo (MCMC) or the genetic algorithm might address the issue.

In the current manuscript, we analyzed TCGA non-synonymous point mutations for the purpose of testing the MEGSA algorithm. We plan to extend the analysis to include somatic copy-number aberrations (SCNAs), recurrent gene fusions,<sup>31</sup> and epigenetic alternations. Moreover, it would be extremely interesting to restrict analysis to clonal point mutations that are carried by all cancer cells. Clonal mutations happen before the most recent common ancestor and are located early in the evolution tree of the tumor;<sup>43</sup> thus, clonal mutations are probably relevant for tumorigenesis. Focusing the analysis on clonal mutations,

although technically challenging,<sup>44–46</sup> can substantially reduce the background mutation rates and consequently improve statistical power. More importantly, this refined analysis might better reveal oncogenic pathways related with tumorigenesis.

## Appendix A

### A Likelihood Ratio Statistic for Testing Mutual Exclusivity

Suppose that a MEGS has  $m$  genes with mutation matrix denoted as  $A_0$ . We assume that the  $m$  genes are completely mutually exclusive. A MEGS is characterized by two parameters: the coverage  $\gamma$ , defined as the proportion of samples covered by the MEGS, and the relative mutation frequencies  $P = (p_1, \dots, p_m)$ . Background mutations are mutually independent and also independent of the MEGS mutations. We allow different background mutation rates  $\Pi = (\pi_1, \dots, \pi_m)$  for different genes. See Figure 1B.

For subject  $i$ , let  $(a_{i1}, \dots, a_{im})$  be the observed binary mutation vector for  $m$  genes. Let  $C_i$  be a discrete binary variable. If the subject is not covered by the MEGS,  $C_i = 0$ . If the subject has a mutation in gene  $k$  in the MEGS, then  $C_i = k$ . The likelihood of observing  $(a_{i1}, \dots, a_{im})$  is given by

$$\begin{aligned} P(a_{i1}, \dots, a_{im}) &= \sum_{k=0}^m P(a_{i1}, \dots, a_{im} \mid C_i = k)P(C_i = k) \\ &= P(a_{i1}, \dots, a_{im} \mid C_i = 0)P(C_i = 0) + P(C_i > 0) \sum_{k=1}^m P(a_{i1}, \dots, a_{im} \mid C_i = k)P(C_i = k \mid C_i > 0) \quad (\text{Equation A1}) \\ &= P(C_i = 0) \prod_{j=1}^m P(a_{ij} \mid C_i = 0) + P(C_i > 0) \sum_{k=1}^m P(C_i = k \mid C_i > 0) \prod_{j=1}^m P(a_{ij} \mid C_i = k). \end{aligned}$$

The last equation holds because mutations are independent across genes. By the definition of coverage,

$$P(C_i > 0) = \gamma \text{ and } P(C_i = 0) = 1 - \gamma. \quad (\text{Equation A2})$$

Also,

$$P(C_i = k \mid C_i > 0) = p_k. \quad (\text{Equation A3})$$

If the subject is not covered by the MEGS,

$$P(a_{ik} = 1 \mid C_i = 0) = \pi_k. \quad (\text{Equation A4})$$

Furthermore,

$$P(a_{ij} = 1 \mid C_i = k) = \begin{cases} 1 & \text{if } j = k \\ \pi_j & \text{if } j \neq k \end{cases}. \quad (\text{Equation A5})$$

Combining Equations A1, A2, A3, A4, and A5, we have

$$\begin{aligned} P(a_{i1}, \dots, a_{im}) &= (1 - \gamma) \prod_{k=1}^m \pi_k^{a_{ik}} (1 - \pi_k)^{1-a_{ik}} \\ &\quad + \gamma \sum_{k=1}^m p_k I_{\{a_{ik}=1\}} \prod_{j \neq k} \pi_j^{a_{ij}} (1 - \pi_j)^{1-a_{ij}}. \end{aligned}$$

The total likelihood across  $N$  subjects is

$$\begin{aligned} \log L(\gamma, \Pi, P; A^0) &= \sum_{i=1}^N \log \left( (1 - \gamma) \prod_{k=1}^m \pi_k^{a_{ik}} (1 - \pi_k)^{1-a_{ik}} \right. \\ &\quad \left. + \gamma \sum_{k=1}^m p_k I_{\{a_{ik}=1\}} \prod_{j \neq k} \pi_j^{a_{ij}} (1 - \pi_j)^{1-a_{ij}} \right). \end{aligned} \quad (\text{Equation A6})$$

We test  $H_0: \gamma = 0$  versus  $H_1: \gamma > 0$ .  $P = (p_1, \dots, p_m)$  and  $\Pi = (\pi_1, \dots, \pi_m)$  are nuisance parameters. Although both parameters can be estimated under  $H_1$ ,  $P = (p_1, \dots, p_m)$  is not involved in the likelihood under  $H_0$ , which causes problems in deriving the asymptotic null distribution for the likelihood ratio test (LRT). To overcome this problem, we further assume that the MEGS mutation frequencies are proportional to the background mutation frequencies, i.e.,  $p_k \propto \pi_k$ . Under this assumption, Equation A6 reduces to

$$\begin{aligned} \log L(\gamma, \Pi; A^0) &= \sum_{i=1}^N \log \left( (1 - \gamma) \prod_{k=1}^m \pi_k^{a_{ik}} (1 - \pi_k)^{1-a_{ik}} \right. \\ &\quad \left. + \gamma \frac{1}{\sum_{j=1}^m \pi_j} \sum_{k=1}^m \pi_k I_{\{a_{ik}=1\}} \prod_{j \neq k} \pi_j^{a_{ij}} (1 - \pi_j)^{1-a_{ij}} \right). \end{aligned} \quad (\text{Equation A7})$$

Let  $\hat{\Pi}_1$  and  $\hat{\gamma}_1$  be the estimate under  $H_1$  and  $\hat{\Pi}_0$  be the estimate under  $H_0$ . The LRT is calculated as  $S = 2(\log L(\hat{\gamma}_1, \hat{\Pi}_1; A^0) - \log L(0, \hat{\Pi}_0; A^0))$ . Asymptotically, LRT has a null distribution  $0.5\chi_0^2 + 0.5\chi_1^2$ , a mixture distribution with 0.5 probability at point mass zero and 0.5 probability as  $\chi_1^2$ .

We have two comments. First, the assumption  $p_k \propto \pi_k$  does not affect the null distribution of LRT because  $p_k$  is

not involved in the data generation process under  $H_0$ . However, violation of this assumption might cause power loss, which warrants further investigation. Second, the LRT in the LRT-SB method was derived based on a different data generative model, which incorrectly and unnecessarily assumed that background mutations could happen only for subjects covered by the MEGS. Under this model, their likelihood function degraded as the coverage  $\gamma \rightarrow 0$ , preventing them from using the standard statistical theory to derive the null distribution. To overcome this problem, they used Vuong's<sup>47</sup> method (but incorrectly) to derive an incorrect asymptotic null distribution. More details are in the [Supplemental Note](#).

### Testing the Global Null Hypothesis

Our algorithm for testing the global null hypothesis (GNH) has the following steps. (1) For  $k \leq K$ , we search all gene sets of size  $k$  from  $M$  genes to test for ME using LRT and denote the minimum p value as  $P_k$ . (2) We run  $T$  permutations, calculate the minimum LRT p value  $P_k(t)$  for permutation  $t$ , and estimate the significance (denoted as  $Q_k$ ) of the observed  $P_k$  as the proportion of simulations with  $P_k(t)$  smaller than the observed  $P_k$ . Intuitively,  $Q_k$  measures the significance when searching only for MEGS of size  $k$ . (3) Because we search for MEGS of different sizes, the overall statistic for testing GNH is defined as  $\theta = \min(Q_2, \dots, Q_K)$ , with overall significance evaluated by permutations again.

Although conceptually straightforward, it is computationally infeasible. Finding the minimum p value  $P_k$  even for a moderate  $k$  (e.g.,  $k = 6$ ) is computationally very challenging and not feasible for thousands of permutations. We propose a multiple-path search algorithm to address the problem. In brief, we calculate the p values for all  $M(M-1)/2$  pairs of genes and choose the top  $L$  (e.g.,  $L = 10$ ) pairs to start linear search. For the  $l^{\text{th}}$  pair (assuming  $G_1$  and  $G_2$ ), let  $q_2(l)$  be the LRT p value. Next, we calculate the LRT p values for  $M-2$  triplets ( $G_1, G_2, G_3$ ),  $\dots$ , ( $G_1, G_2, G_M$ ) and choose the gene (assuming  $G_3$ ) with the smallest p value, denoted as  $q_3(l)$ . We repeat until  $q_k(l)$ . For each  $k$ , we approximate  $P_k$  by  $\min_{l \leq L} q_k(l)$ , instead of exhaustive search.

### Identify Statistically Significant MEGS

Remember that we use  $\theta = \min(Q_2, \dots, Q_K)$  as the overall statistic for testing GNH. Once GNH is rejected at level  $\alpha = 0.05$ , we need to identify all combinations of genes that reach significance. First of all, based on permutations, we can identify a cut-off  $\theta_{1-\alpha}$ . In the multiple-path search algorithm described above, for each combination of  $k$  genes, we transform its nominal LRT p value to  $Q$  based on permutations and declare this gene set as significant if  $Q < \theta_{1-\alpha}$ . This procedure can identify significant but nested putative MEGS. We designed a model selection procedure described in [Figure 1D](#) to make a choice between nested models.

### Supplemental Data

Supplemental Data include Supplemental Note, eight figures, and five tables and can be found with this article online at <http://dx.doi.org/10.1016/j.ajhg.2015.12.021>.

### Acknowledgments

This study utilized the computational resources of the NIH HPC Biowulf cluster. The authors are supported by the National Cancer Institute Intramural Research Program.

Received: August 17, 2015

Accepted: December 30, 2015

Published: February 18, 2016

### Web Resources

The URLs for data presented herein are as follows:

Dendrix, <http://compbio.cs.brown.edu/software/>

HPC @ NIH, <http://hpc.nih.gov>

MEGSA, <http://dceg.cancer.gov/tools/analysis/MEGSA>

Mutex, <http://code.google.com/p/mutex>

MutSigCV, <http://www.broadinstitute.org/cancer/software/genepattern/modules/docs/MutSigCV>

OMIM, <http://www.omim.org/>

RME, <https://github.com/chrisamiller/RMEmod>

The Cancer Genome Atlas, <http://cancergenome.nih.gov/>

TumorPortal, <http://www.tumorportal.org/>

### References

1. Lawrence, M.S., Stojanov, P., Polak, P., Kryukov, G.V., Cibulskis, K., Sivachenko, A., Carter, S.L., Stewart, C., Mermel, C.H., Roberts, S.A., et al. (2013). Mutational heterogeneity in cancer and the search for new cancer-associated genes. *Nature* 499, 214–218.
2. Hodis, E., Watson, I.R., Kryukov, G.V., Arold, S.T., Imielinski, M., Theurillat, J.P., Nickerson, E., Auclair, D., Li, L., Place, C., et al. (2012). A landscape of driver mutations in melanoma. *Cell* 150, 251–263.
3. Pao, W., Wang, T.Y., Riely, G.J., Miller, V.A., Pan, Q., Ladanyi, M., Zakowski, M.F., Heelan, R.T., Kris, M.G., and Varmus, H.E. (2005). KRAS mutations and primary resistance of lung adenocarcinomas to gefitinib or erlotinib. *PLoS Med.* 2, e17.
4. Ding, L., Getz, G., Wheeler, D.A., Mardis, E.R., McLellan, M.D., Cibulskis, K., Sougnez, C., Greulich, H., Muzny, D.M., Morgan, M.B., et al. (2008). Somatic mutations affect key pathways in lung adenocarcinoma. *Nature* 455, 1069–1075.
5. Cancer Genome Atlas Research Network (2014). Comprehensive molecular profiling of lung adenocarcinoma. *Nature* 511, 543–550.
6. Ciriello, G., Cerami, E., Sander, C., and Schultz, N. (2012). Mutual exclusivity analysis identifies oncogenic network modules. *Genome Res.* 22, 398–406.
7. Vandin, F., Upfal, E., and Raphael, B.J. (2012). De novo discovery of mutated driver pathways in cancer. *Genome Res.* 22, 375–385.
8. Szczurek, E., and Beerenwinkel, N. (2014). Modeling mutual exclusivity of cancer mutations. *PLoS Comput. Biol.* 10, e1003503.



9. Zhao, J., Zhang, S., Wu, L.Y., and Zhang, X.S. (2012). Efficient methods for identifying mutated driver pathways in cancer. *Bioinformatics* 28, 2940–2947.
10. Leiserson, M.D., Blokh, D., Sharan, R., and Raphael, B.J. (2013). Simultaneous identification of multiple driver pathways in cancer. *PLoS Comput. Biol.* 9, e1003054.
11. Babur, O., Gonen, M., Aksoy, A.B., Schultz, N., Giovanni, C., Sander, C., and Demir, E. (2015). Systematic identification of cancer driving signaling pathways based on mutual exclusivity of genomic alterations (BioRxiv) <http://dx.doi.org/10.1101/009878>.
12. Miller, C.A., Settle, S.H., Sulman, E.P., Aldape, K.D., and Milosavljevic, A. (2011). Discovering functional modules by identifying recurrent and mutually exclusive mutational patterns in tumors. *BMC Med. Genomics* 4, 34.
13. Benjamini, Y., and Hochberg, Y. (1995). Controlling the false discovery rate: a practical and powerful approach to multiple testing. *J. R. Stat. Soc., B* 57, 289–300.
14. Lawrence, M.S., Stojanov, P., Mermel, C.H., Robinson, J.T., Garraway, L.A., Golub, T.R., Meyerson, M., Gabriel, S.B., Lander, E.S., and Getz, G. (2014). Discovery and saturation analysis of cancer genes across 21 tumour types. *Nature* 505, 495–501.
15. Cancer Genome Atlas Network (2012). Comprehensive molecular portraits of human breast tumours. *Nature* 490, 61–70.
16. Peterson, E.J., Böglér, O., and Taylor, S.M. (2003). p53-mediated repression of DNA methyltransferase 1 expression by specific DNA binding. *Cancer Res.* 63, 6579–6582.
17. Yan, W., Cao, Q.J., Arenas, R.B., Bentley, B., and Shao, R. (2010). GATA3 inhibits breast cancer metastasis through the reversal of epithelial-mesenchymal transition. *J. Biol. Chem.* 285, 14042–14051.
18. Mottis, A., Mouchiroud, L., and Auwerx, J. (2013). Emerging roles of the corepressors NCoR1 and SMRT in homeostasis. *Genes Dev.* 27, 819–835.
19. Adikesavan, A.K., Karmakar, S., Pardo, P., Wang, L., Liu, S., Li, W., and Smith, C.L. (2014). Activation of p53 transcriptional activity by SMRT: a histone deacetylase 3-independent function of a transcriptional corepressor. *Mol. Cell. Biol.* 34, 1246–1261.
20. Saldaña-Meyer, R., González-Buendía, E., Guerrero, G., Narendra, V., Bonasio, R., Recillas-Targa, E., and Reinberg, D. (2014). CTCF regulates the human p53 gene through direct interaction with its natural antisense transcript, Wrap53. *Genes Dev.* 28, 723–734.
21. Soto-Reyes, E., and Recillas-Targa, F. (2010). Epigenetic regulation of the human p53 gene promoter by the CTCF transcription factor in transformed cell lines. *Oncogene* 29, 2217–2227.
22. Guan, B., Wang, T.L., and Shih, IeM. (2011). ARID1A, a factor that promotes formation of SWI/SNF-mediated chromatin remodeling, is a tumor suppressor in gynecologic cancers. *Cancer Res.* 71, 6718–6727.
23. Samartzis, E.P., Gutsche, K., Dedes, K.J., Fink, D., Stucki, M., and Imesch, P. (2014). Loss of ARID1A expression sensitizes cancer cells to PI3K- and AKT-inhibition. *Oncotarget* 5, 5295–5303.
24. Wang, G., Balamotis, M.A., Stevens, J.L., Yamaguchi, Y., Handa, H., and Berk, A.J. (2005). Mediator requirement for both recruitment and postrecruitment steps in transcription initiation. *Mol. Cell* 17, 683–694.
25. Stevens, J.L., Cantin, G.T., Wang, G., Shevchenko, A., Shevchenko, A., and Berk, A.J. (2002). Transcription control by E1A and MAP kinase pathway via Sur2 mediator subunit. *Science* 296, 755–758.
26. Yang, X., Zhao, M., Xia, M., Liu, Y., Yan, J., Ji, H., and Wang, G. (2012). Selective requirement for Mediator MED23 in Ras-active lung cancer. *Proc. Natl. Acad. Sci. USA* 109, E2813–E2822.
27. Poss, Z.C., Ebmeier, C.C., and Taatjes, D.J. (2013). The Mediator complex and transcription regulation. *Crit. Rev. Biochem. Mol. Biol.* 48, 575–608.
28. Ching, N.O., and Frenkel, B. (2013). The RUNX family in breast cancer: relationships with estrogen signaling. *Oncogene* 32, 2121–2130.
29. Decristofaro, M.F., Betz, B.L., Rorie, C.J., Reisman, D.N., Wang, W., and Weissman, B.E. (2001). Characterization of SWI/SNF protein expression in human breast cancer cell lines and other malignancies. *J. Cell. Physiol.* 186, 136–145.
30. Ozaki, T., Nakagawara, A., and Nagase, H. (2013). RUNX family participates in the regulation of p53-dependent DNA damage response. *Int. J. Genomics* 2013, 271347.
31. Cancer Genome Atlas Research Network (2013). Genomic and epigenomic landscapes of adult de novo acute myeloid leukemia. *N. Engl. J. Med.* 368, 2059–2074.
32. Scholl, C., Gilliland, D.G., and Fröhling, S. (2008). Deregulation of signaling pathways in acute myeloid leukemia. *Semin. Oncol.* 35, 336–345.
33. Cairns, R.A., Harris, I.S., and Mak, T.W. (2011). Regulation of cancer cell metabolism. *Nat. Rev. Cancer* 11, 85–95.
34. Cohen, A.L., Holmen, S.L., and Colman, H. (2013). IDH1 and IDH2 mutations in gliomas. *Curr. Neurol. Neurosci. Rep.* 13, 345.
35. Smolková, K., and Ježek, P. (2012). The role of mitochondrial NADPH-dependent isocitrate dehydrogenase in cancer cells. *Int. J. Cell Biol.* 2012, 273947.
36. Lin, R.K., Wu, C.Y., Chang, J.W., Juan, L.J., Hsu, H.S., Chen, C.Y., Lu, Y.Y., Tang, Y.A., Yang, Y.C., Yang, P.C., and Wang, Y.C. (2010). Dysregulation of p53/Sp1 control leads to DNA methyltransferase-1 overexpression in lung cancer. *Cancer Res.* 70, 5807–5817.
37. van Lith, S.A., Navis, A.C., Verrijp, K., Niclou, S.P., Bjerkvig, R., Wesseling, P., Tops, B., Molenaar, R., van Noorden, C.J., and Leenders, W.P. (2014). Glutamate as chemotactic fuel for diffuse glioma cells: are they glutamate suckers? *Biochim. Biophys. Acta* 1846, 66–74.
38. Jiang, P., Du, W., and Yang, X. (2013). p53 and regulation of tumor metabolism. *J. Carcinog.* 12, 21.
39. Wallace, D.C. (2012). Mitochondria and cancer. *Nat. Rev. Cancer* 12, 685–698.
40. Son, Y., Cheong, Y.K., Kim, N.H., Chung, H.T., Kang, D.G., and Pae, H.O. (2011). Mitogen-activated protein kinases and reactive oxygen species: how can ROS activate MAPK pathways? *J. Signal Transduct.* 2011, 792639.
41. Liou, G.Y., and Storz, P. (2010). Reactive oxygen species in cancer. *Free Radic. Res.* 44, 479–496.
42. Leiserson, M.D., Wu, H.T., Vandin, F., and Raphael, B.J. (2015). CoMEt: a statistical approach to identify combinations of mutually exclusive alterations in cancer. *Genome Biol.* 16, 160.
43. Nik-Zainal, S., Van Loo, P., Wedge, D.C., Alexandrov, L.B., Greenman, C.D., Lau, K.W., Raine, K., Jones, D., Marshall, J., Ramakrishna, M., et al.; Breast Cancer Working Group of the International Cancer Genome Consortium (2012). The life history of 21 breast cancers. *Cell* 149, 994–1007.

44. Carter, S.L., Cibulskis, K., Helman, E., McKenna, A., Shen, H., Zack, T., Laird, P.W., Onofrio, R.C., Winckler, W., Weir, B.A., et al. (2012). Absolute quantification of somatic DNA alterations in human cancer. *Nat. Biotechnol.* *30*, 413–421.
45. Oesper, L., Mahmoody, A., and Raphael, B.J. (2013). THetA: inferring intra-tumor heterogeneity from high-throughput DNA sequencing data. *Genome Biol.* *14*, R80.
46. Landau, D.A., Carter, S.L., Stojanov, P., McKenna, A., Stevenson, K., Lawrence, M.S., Sougnez, C., Stewart, C., Sivachenko, A., Wang, L., et al. (2013). Evolution and impact of subclonal mutations in chronic lymphocytic leukemia. *Cell* *152*, 714–726.
47. Vuong, Q.H. (1989). Likelihood ratio tests for model selection and non-nested hypotheses. *Econometrica* *57*, 307–333.

**The American Journal of Human Genetics, Volume 98**

**Supplemental Information**

**MEGSA: A Powerful and Flexible Framework  
for Analyzing Mutual Exclusivity of Tumor Mutations**

**Xing Hua, Paula L. Hyland, Jing Huang, Lei Song, Bin Zhu, Neil E. Caporaso, Maria Teresa Landi, Nilanjan Chatterjee, and Jianxin Shi**

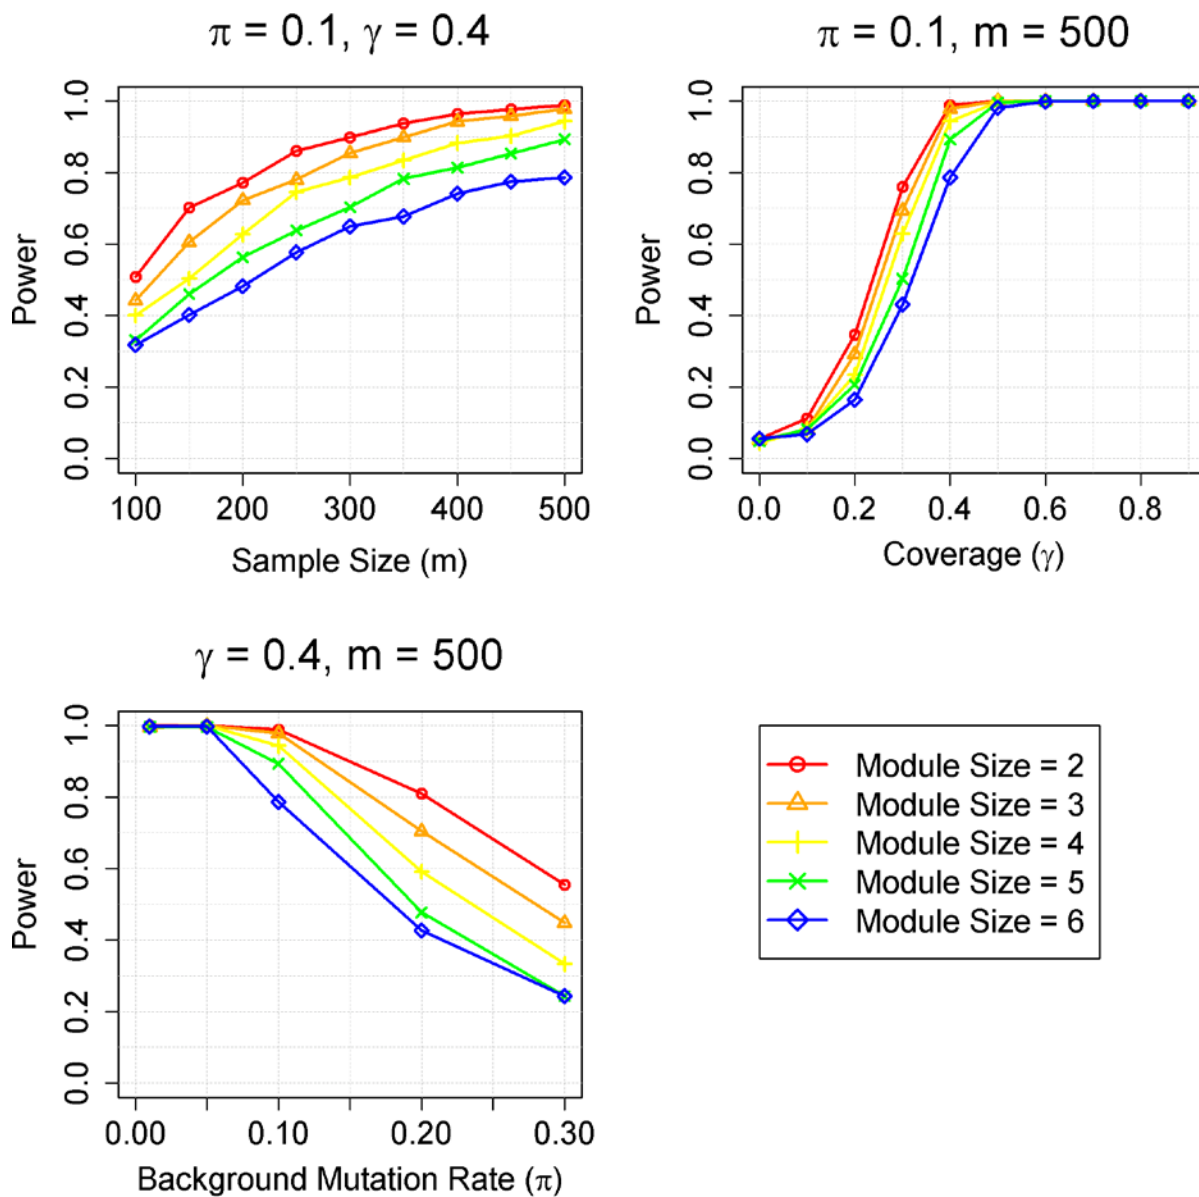

**Figure S1: Power behavior of our likelihood ratio test.** Power was estimated at level  $\alpha=0.05$  based on 1000 simulations. Power increases with sample size and coverage but decreases with background mutation rate.  $\pi$  is the background mutation rate for all genes.  $\gamma$  is the coverage of the simulated MEGS.  $m$  is the sample size.



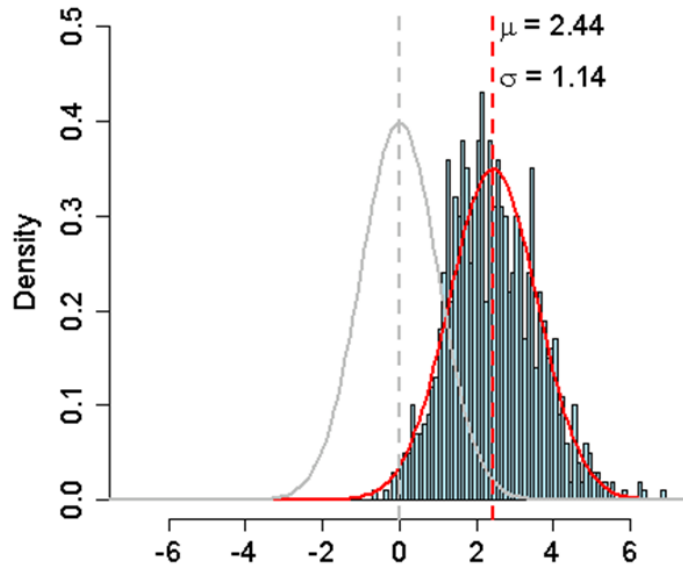

**Figure S2: Null distribution of LRT-SB.** Simulations were performed under the null hypothesis with 1000 samples and four genes. All four genes had the same mutation frequency 20%. The histogram was based on simulations. The red curve is fitted to the histogram with mean 2.44 and standard deviation 1.14. In the original paper, the null distribution was claimed to be  $N(0, 1)$ .

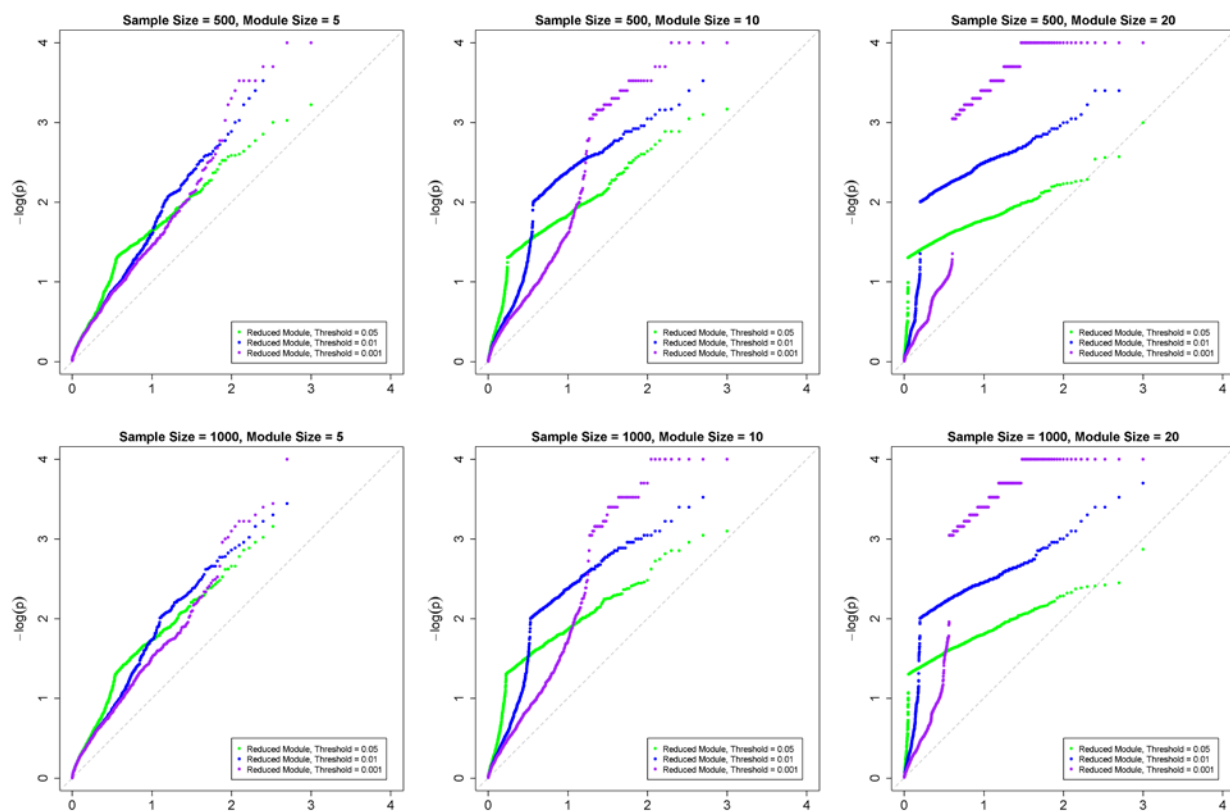

**Figure S3: Quantile-quantile (QQ) plot of  $P$ -values for “cliques” under global null hypothesis, generated by the algorithms in MEMO.** Mutation frequency is 10% for each gene. MEMO uses a default threshold  $P_0=0.05$  in their procedure. Here, we tried three different thresholds 0.05, 0.01 and 0.001. For each simulation, we make QQ plot against the uniform distribution  $U(0,1)$ . The x-coordinate is  $\log(p)$  with  $p \sim U(0,1)$ . The y-coordinate is the  $\log(p)$  for observed overall  $P$ -values produced from the MEMO algorithm.  $P$ -values deviate  $U(0,1)$ .

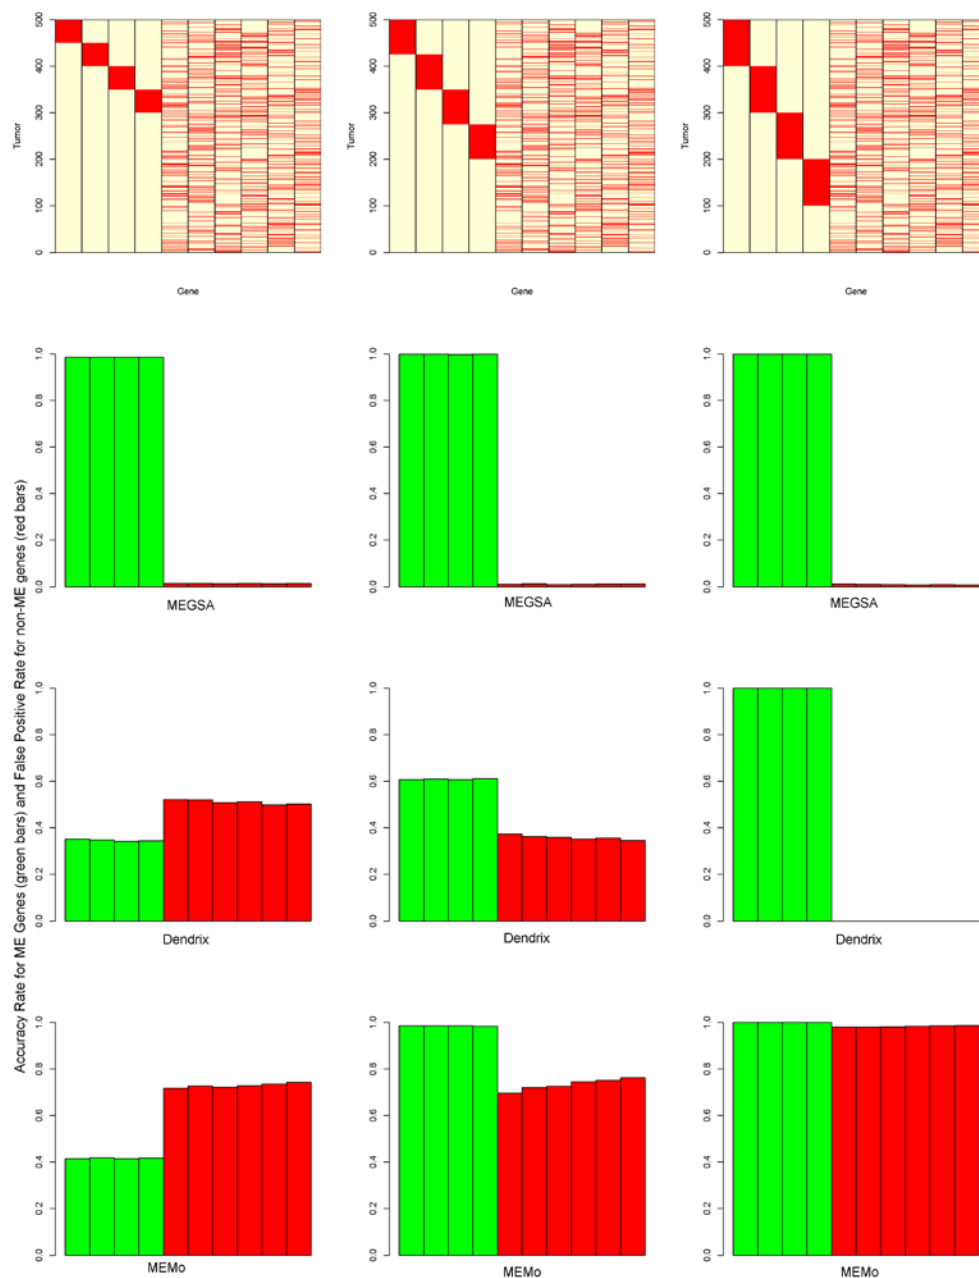

**Figure S4: Number of true positive and false positive genes.** For MEGSA and Dendrix, numbers are calculated based on the top MEGS candidate. For MEMo, the numbers are calculated based on the algorithm described in Supplementary Note. We performed simulations using three sets of parameters with coverage ranging from 0.4 to 0.8. The figures in the first row show the simulated pattern with four genes (left four) in MEGS and six genes randomly mutated (right six). The left four bars (green) show the probability of choosing the true MEGS genes. The right six bars (red) show the probability of choosing false positive genes. The simulation was based on 4 MEGS genes and 6 non-MEGS genes.

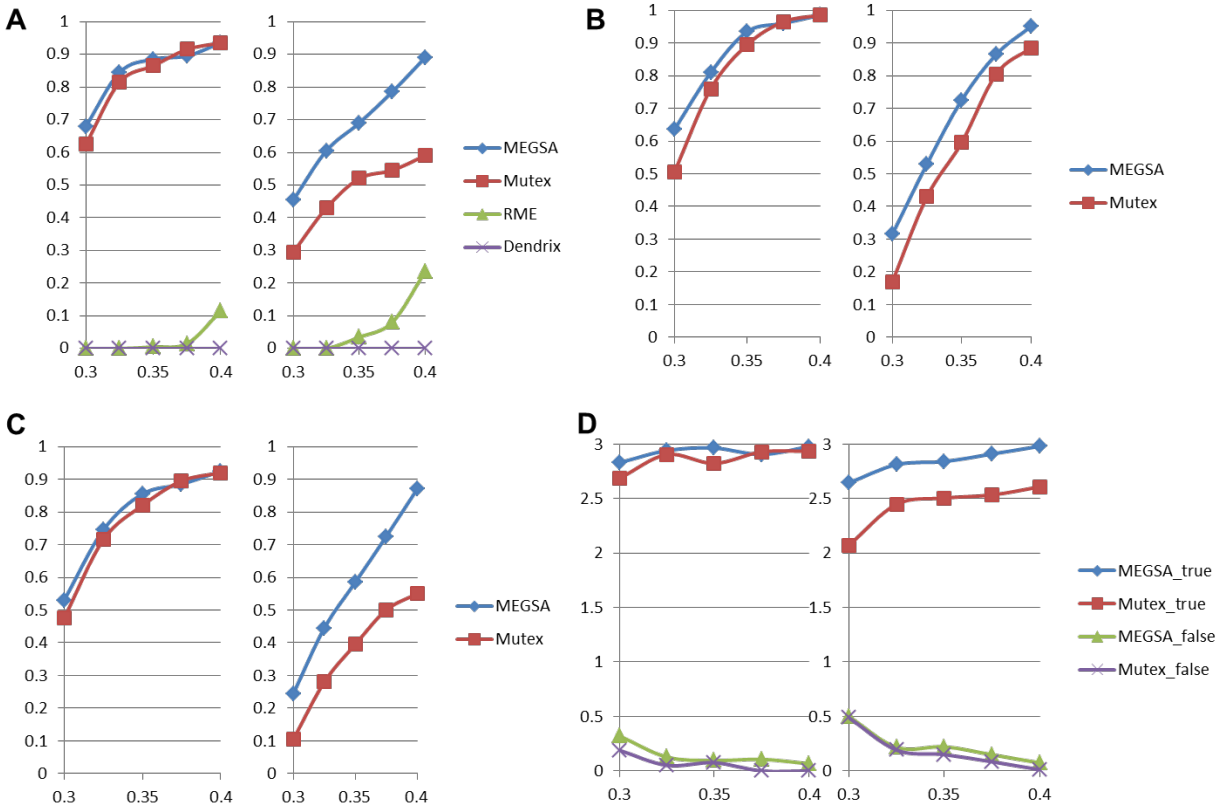

**Figure S5: Performance comparison of methods for detecting mutually exclusive gene sets.** In all simulations, we have 53 genes with 50 being randomly simulated with specific mutation frequencies and 3 genes as MEGS. For each comparison, the left panel is for balanced MEGS with mutation frequency ratio 1:1:1; the right panel is for imbalanced MEGS with mutation frequency ratio 4:1:1. In all figures, the x-coordinate is the coverage  $\gamma$ , ranging from 0.3 to 0.4. (A) Probability of ranking the true MEGS as top candidate. (B) Power of detecting true MEGS using MEGSA and Mutex. (C) Probability that the identified top MEGS is statistically significant and identical to the true MEGS. (D) The numbers of detected true positive genes (out of 3) and false positive genes.



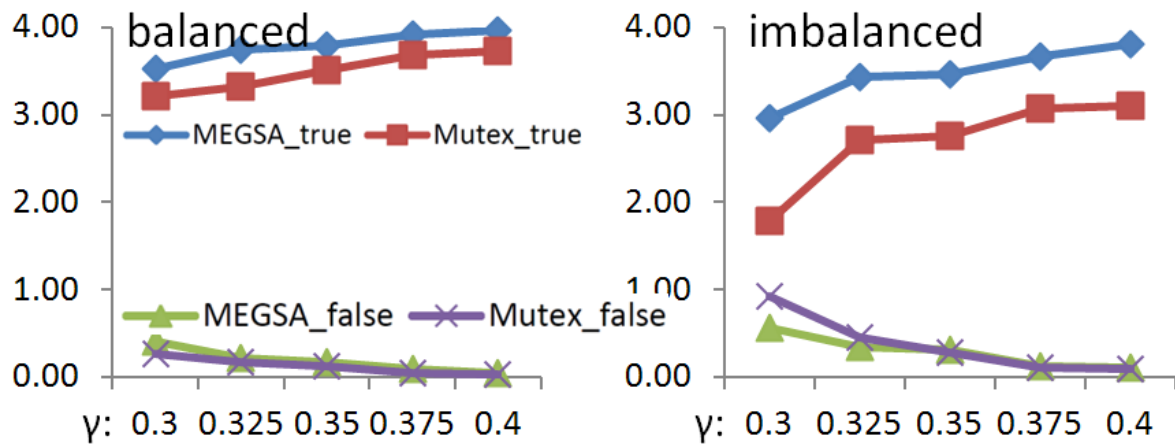

**Figure S6:** The number of true positive and false positive genes detected by MEGSA and Mutex. In all simulations, we have 54 genes with 50 being randomly simulated with specific mutation frequencies and 4 genes as MEGS. In imbalanced MEGS, the mutational frequencies have a ratio 3:1:1:1. For each simulation, we counted the number of selected true genes out of 4 and the number of falsely selected genes not belonging to the simulated MEGS. MEGSA has similar false positive rate but higher number of selected true genes, particularly for imbalanced MEGS.

## Power Compare of Different Strategies

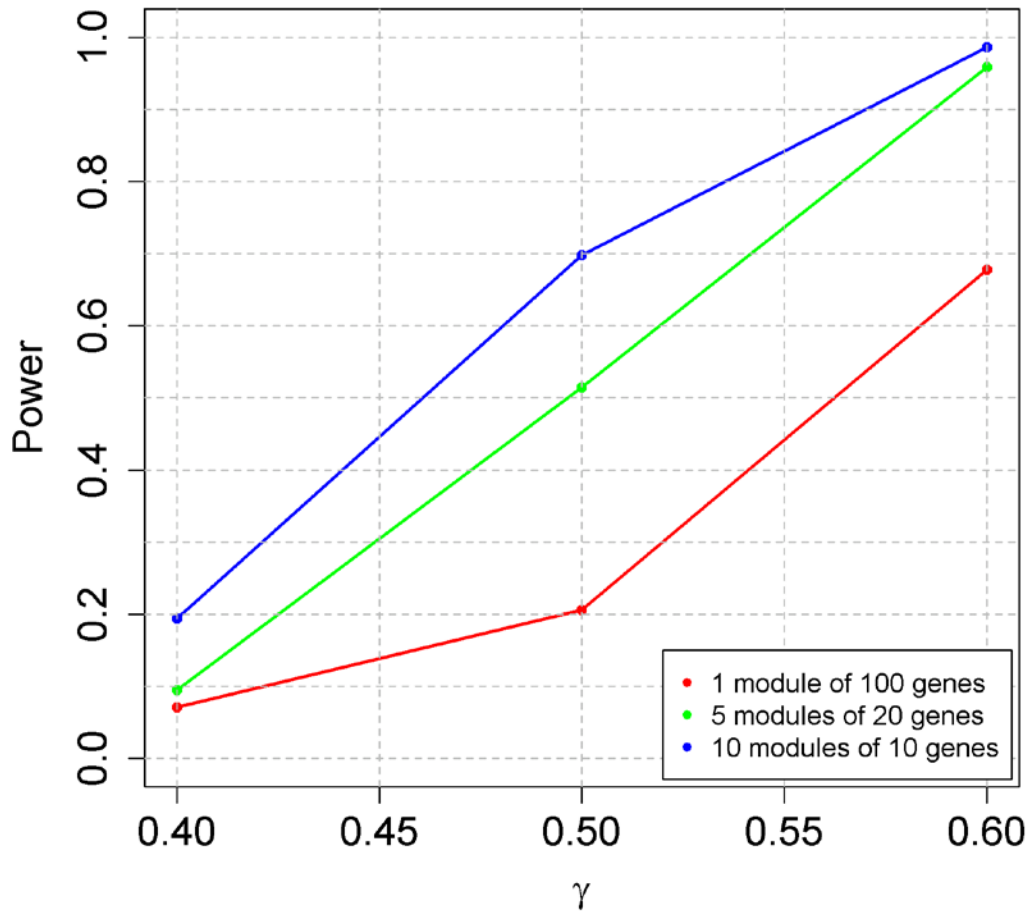

**Figure S7: Compare statistical power of two search strategies using MEGSA.** The simulation was based on  $M=100$  genes and  $N=500$  samples. A balanced MEGS had four genes with background mutation rate 10%. The rest 96 genes were randomly mutated with frequency 10%. We compared the statistical power of rejecting the global null hypothesis for two analysis strategies: *de novo* discovery and pathway-guided search. For *de novo* discovery of MEGS (red curve), we applied MEGSA to the whole set of 100 genes and rejected the global null hypothesis if the overall  $P$ -value is less than 0.05. For pathway-guided search, we assume that 100 genes are split to  $L(L=5 \text{ or } 10)$  non-overlapping modules, each of which has  $100/L$  genes. The simulated MEGS were in one of the modules. We applied MEGSA to each of the modules and rejected the global null hypothesis if any of the  $L$   $P$ -values were less than  $0.05/L$  based on the Bonferroni correction. The power was calculated as the proportion of simulations rejecting the global hypothesis. If the MEGS is within any of the cliques, pathway-guided search may substantially improve the power due to the reduced multiple testing burden.

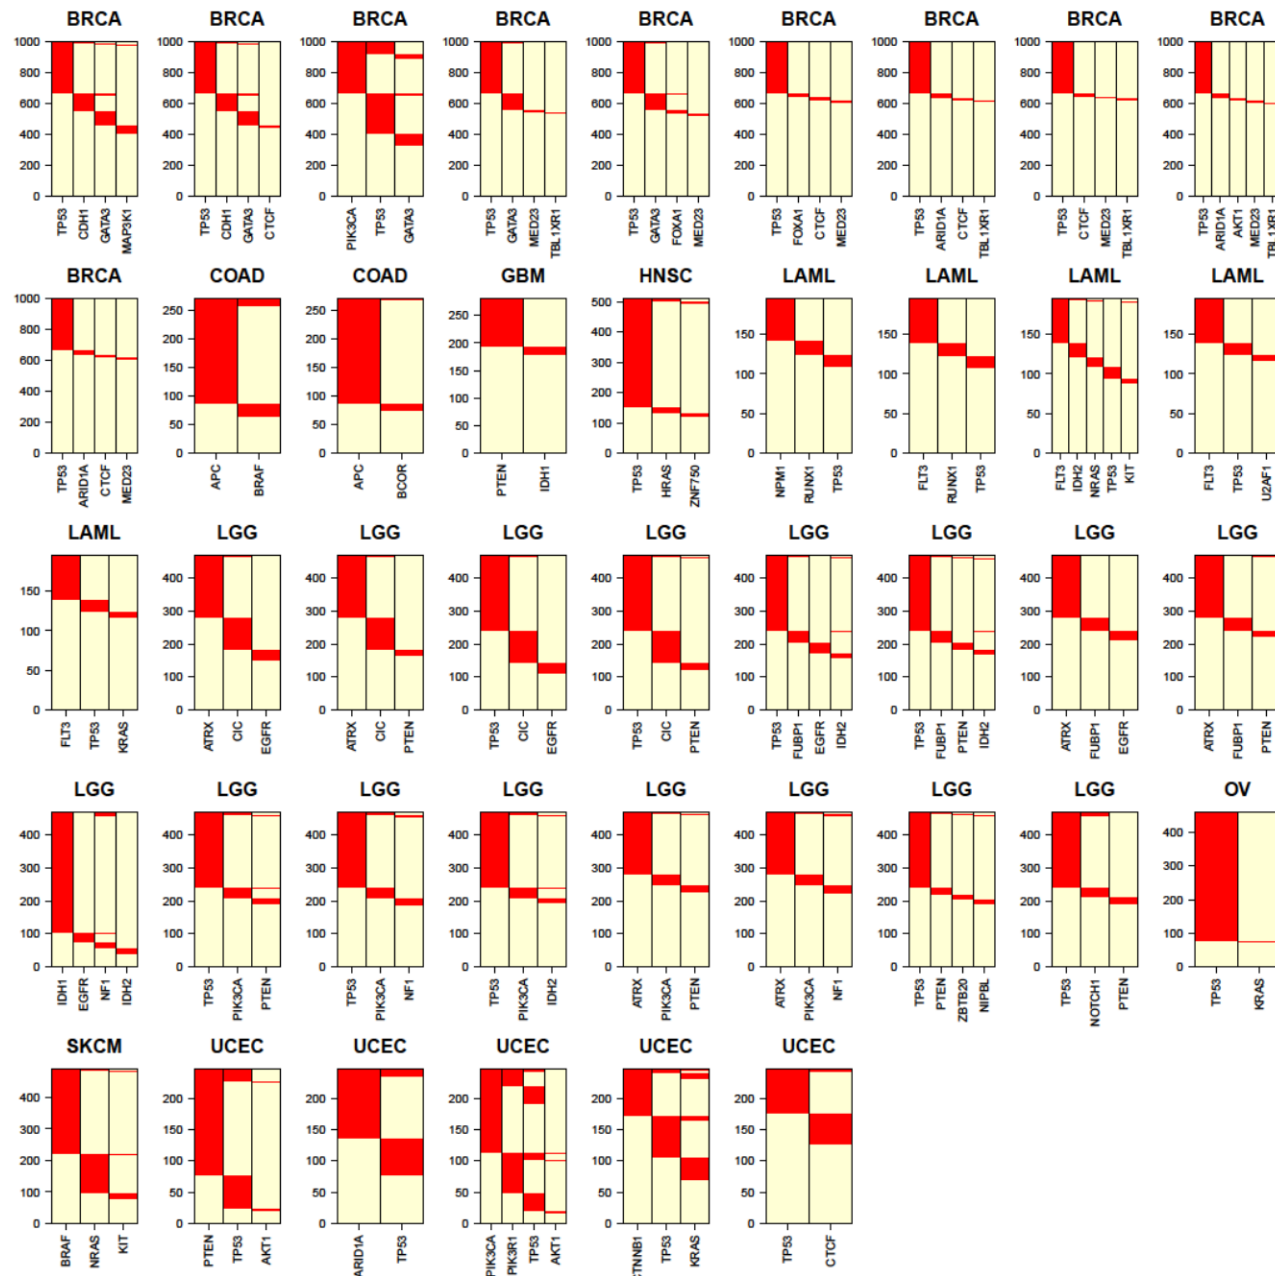

**Figure S8A:** Significant MEGS (multiple testing corrected  $P < 0.05$ ) identified by MEGSA for different cancers using the whole exome sequencing data in TCGA.

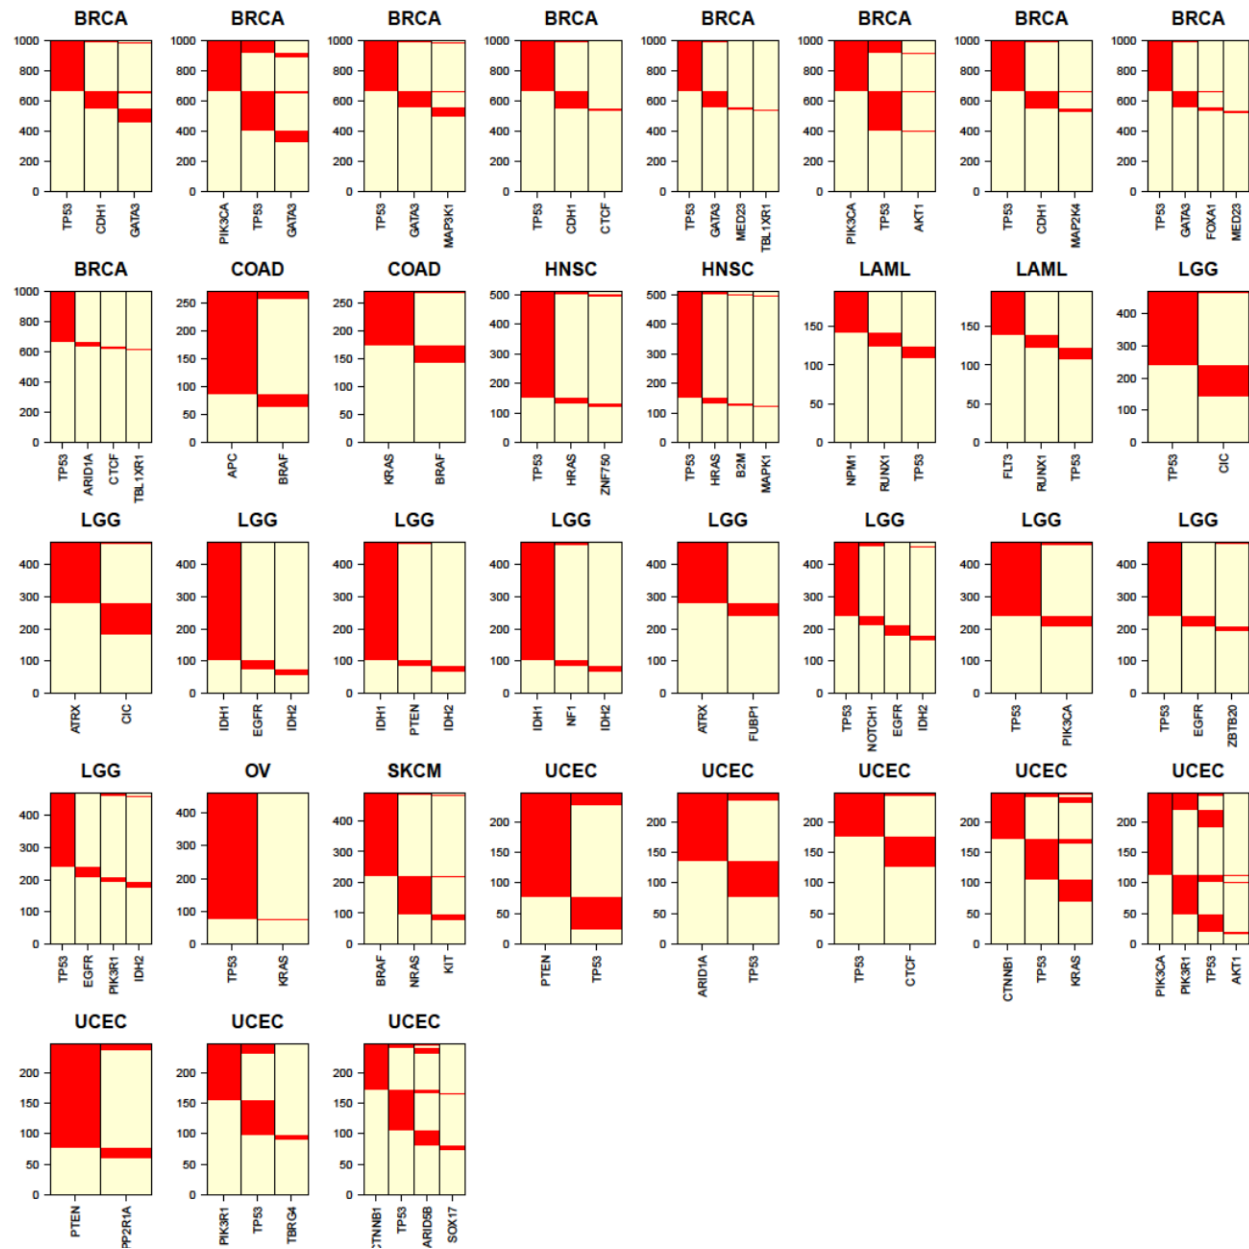

**Figure S8B:** Significant MEGS (FDR  $q$ -value < 0.05) identified by Mutex for different cancers using the whole exome sequencing data in TCGA.



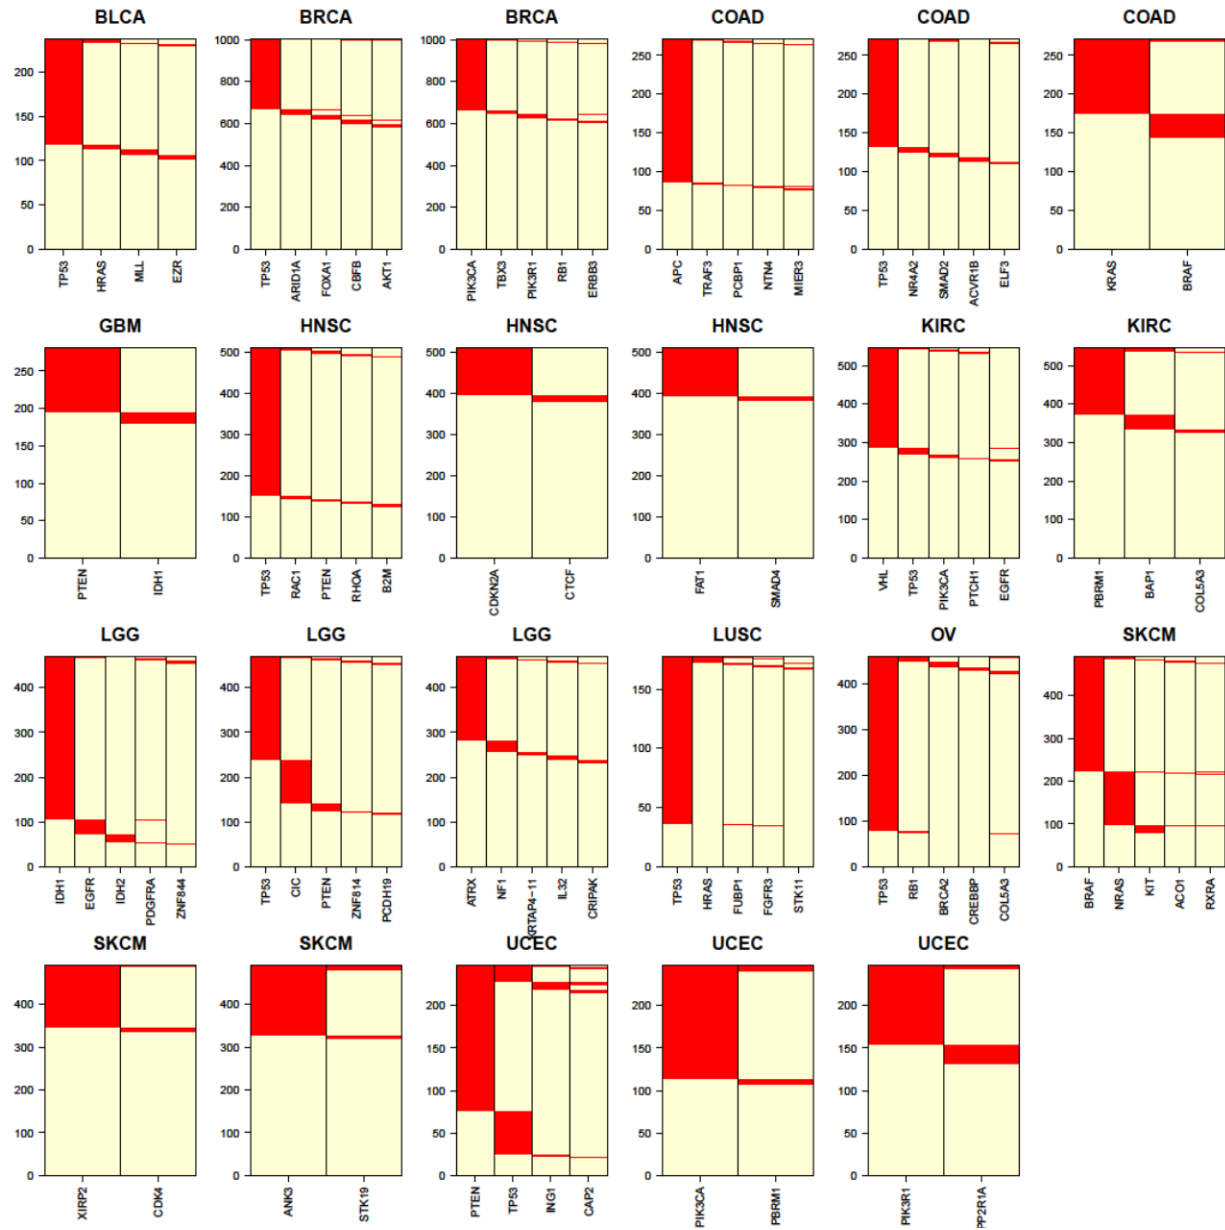

**Figure S8C:** MEGS identified by RME for different cancers using the whole exome sequencing data in TCGA. LAML results were not available because RME did not run successfully on the LAML data.

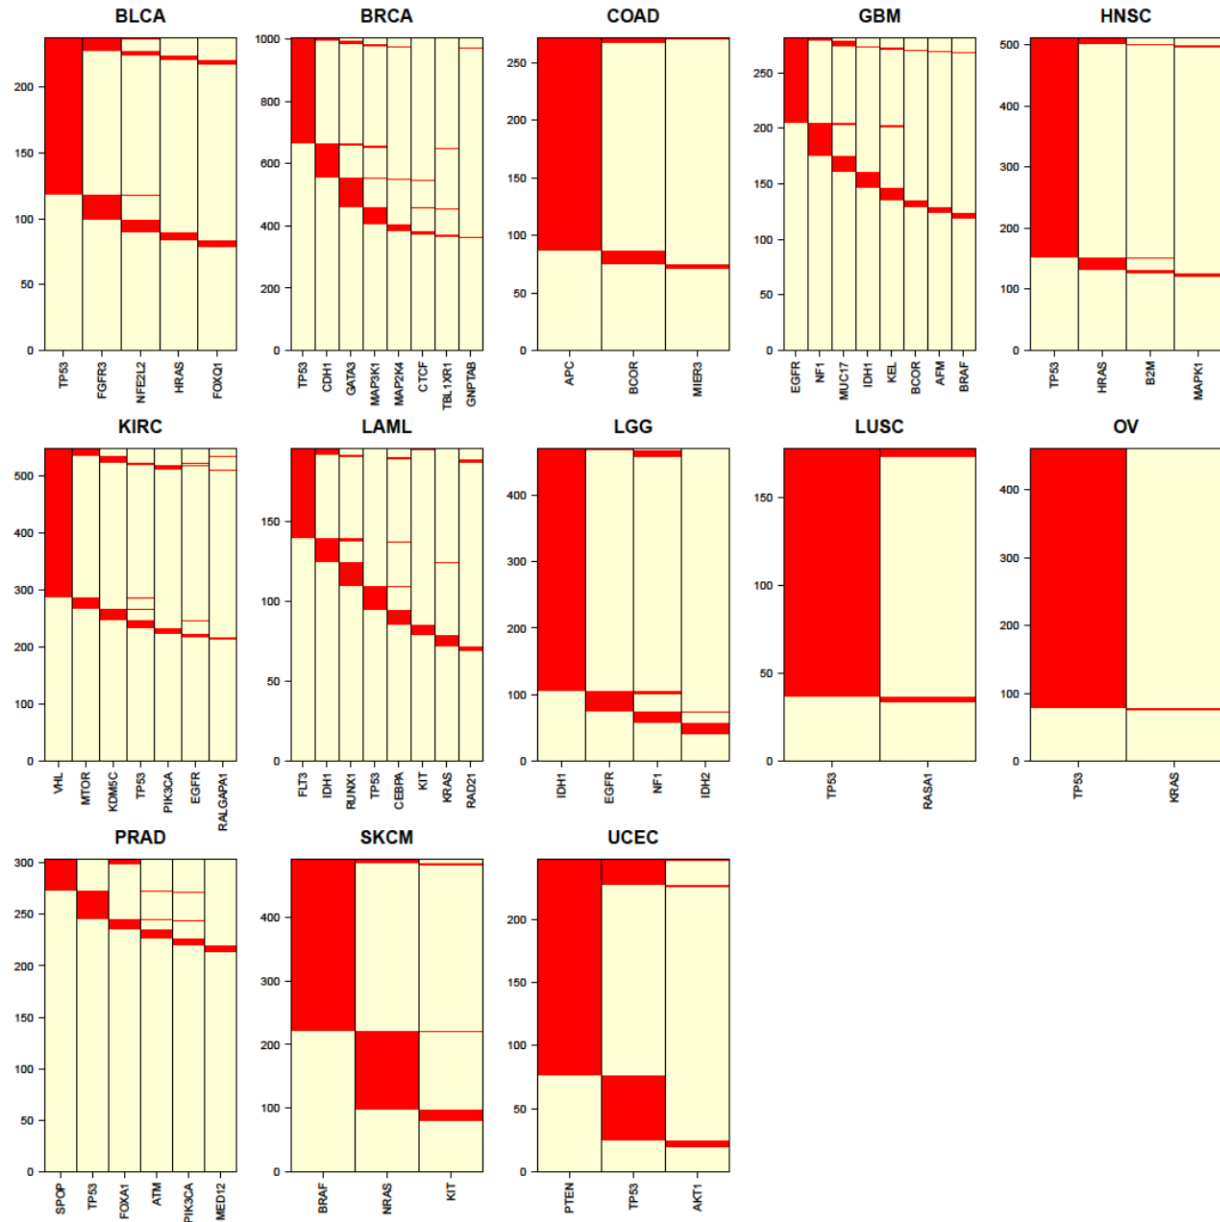

**Figure S8D:** The top MEGS identified by Dendrix for different cancers using the whole exome sequencing data in TCGA.

| $\alpha$ | $\pi$ | k=2      |          | k=3      |          | k=4     |          | k=5      |          | k=6      |         |
|----------|-------|----------|----------|----------|----------|---------|----------|----------|----------|----------|---------|
|          |       | m=100    | m=500    | m=100    | m=500    | m=100   | m=500    | m=100    | m=500    | m=100    | m=500   |
| 0.05     | 0.1   | 0.031    | 0.061    | 0.068    | 0.054    | 0.056   | 0.052    | 0.054    | 0.051    | 0.054    | 0.052   |
|          | 0.2   | 0.061    | 0.053    | 0.053    | 0.051    | 0.053   | 0.051    | 0.053    | 0.051    | 0.053    | 0.051   |
| 0.001    | 0.1   | 0        | 0.0021   | 0.0004   | 0.0012   | 0.001   | 0.0011   | 0.0012   | 0.00107  | 0.0011   | 0.00109 |
|          | 0.2   | 0.00145  | 0.0011   | 0.0012   | 0.00108  | 0.00108 | 0.0010   | 0.0011   | 0.0010   | 0.0011   | 0.00105 |
| 0.0001   | 0.1   | 0        | 0.000021 | 0.000011 | 0.000102 | 0.00007 | 0.000124 | 0.000113 | 0.000099 | 0.000117 | 0.0001  |
|          | 0.2   | 0.000074 | 0.00012  | 0.00013  | 0.00011  | 0.00011 | 0.00010  | 0.00012  | 0.000092 | 0.00012  | 0.00010 |

**Table S1:** Type I error rate for the likelihood ratio statistic. Here,  $\alpha$  is the specified significance level;  $\pi$  is the gene mutation rate, which was assumed the same for all genes in each simulation;  $k$  is the number of genes for simulations;  $m$  is the number of subjects for simulation.

| Cancer type | Number patients | Number of genes | How to select genes |
|-------------|-----------------|-----------------|---------------------|
| BLCA        | 238             | 39              | Tumor Portal        |
| BRCA        | 989             | 39              | Tumor Portal        |
| COAD        | 269             | 39              | Tumor Portal        |
| GBM         | 282             | 34              | Tumor Portal        |
| HNSC        | 511             | 40              | Tumor Portal        |
| KIRC        | 451             | 25              | Tumor Portal        |
| LAML        | 196             | 26              | Tumor Portal        |
| LGG         | 465             | 45              | MutSigCV            |
| LUSC        | 178             | 25              | Tumor Portal        |
| OV          | 462             | 15              | Tumor Portal        |
| PRAD        | 300             | 7               | Tumor Portal        |
| SKCM        | 428             | 39              | Tumor Portal        |
| UCEC        | 248             | 94              | Tumor Portal        |

**Table S2:** Cancer types, the number of subjects and the number of genes included for analysis of mutual exclusivity. Genes were selected by the TumorPortal website: <http://cancergenome.broadinstitute.org/>, which were derived based on the TCGA tumor sequencing data. The TumorPortal website does not report results for LGG; thus we downloaded mutation data from the TCGA website and ran MutSigCV to identify significantly mutated genes.

## Supplementary note: Summary of some methods for detecting mutually exclusive gene sets

### 1. MEMo

MEMo partitions all input genes into  $N$  cliques (fully connected gene networks) based in external biological information. The key is how to derive an overall  $P$ -value for testing the global null hypothesis for a clique with  $M$  genes. For a given gene set with  $m$  genes, MEMo defines the coverage (the proportion of patients with at least one mutation in these genes) as statistic for assessing mutual exclusivity and approximates the significance by permutations. MEMo uses the following procedure to derive an overall  $P$ -value for the clique with  $M$  genes.

- (1) Run permutations for the whole clique with  $M$  genes. If the  $P$ -value ( $P_M$ ) is less than a specified threshold  $P_0$  (default 0.05 in MEMo), the algorithm stops, the overall  $P$ -value is  $P_M$  and the best MEGS has  $M$  genes. Otherwise, go to step 2;
- (2) Delete the gene with the smallest mutation frequency and test the significance for the remaining  $M-1$  genes using permutations. Let  $P$ -value be  $P_{M-1}$ . If  $P_{M-1} < P_0$ , record the overall  $P$ -value as  $P_{M-1}$  and the best MEGS has  $M-1$  genes. Otherwise, repeat step (2) until only two genes remain. In this case, the overall  $P$ -value is  $P_2$ .

After deriving overall  $P$ -values for all cliques, MEMo selects statistically significant cliques by controlling FDR using these overall  $P$ -values. However, controlling FDR requires that  $P$ -values under null hypothesis follow a uniform distribution  $U(0,1)$ . Obviously, the overall  $P$ -values based on the above procedure do not follow  $U(0,1)$ . To numerically demonstrate this, we have re-implemented their algorithm and summarize overall  $P$ -value results in **Supplementary Figure S3**. Clearly, these overall  $P$ -values under null hypothesis dramatically deviate from  $U(0,1)$ , suggesting that MEMo does not control type-I error correctly.

Another problem is the way of selecting “optimal” MEGS. If the true MEGS has 3 genes that are very strongly mutually exclusive, then it is very likely the permutation test has a  $P$ -value  $< P_0$  for the whole clique with  $K$  ( $K >> 3$ ) genes, i.e. MEMo includes too many false positive genes. This is confirmed by simulations, reported in **Supplementary Figure S4**.

### 2. Dendrix/MDPFinder/Multi-Dendrix

Dendrix, MDPFinder and Multi-Dendrix are designed for *de novo* discovery of MEGS. All algorithms use the same criterion for ranking gene sets motivated by two requirements: (1) most patients have at least one mutation in MEGS (high coverage) and (2) most patients have no more than one mutation in MEGS (approximate exclusivity). For a subset of  $m$  genes with mutation matrix  $A_0$ , let  $T(A_0)$  denote the total number of mutations carried by all patients and  $\Gamma(A_0)$  denote the number of patients with at least one mutation. The “weight” statistic is defined as:

$$W(A_0) = \Gamma(A_0) - (T(A_0) - \Gamma(A_0)) = 2\Gamma(A_0) - T(A_0).$$

These algorithms rank and identify MEGS by maximizing  $W(A_0)$  over all possible subsets. However, this criterion is neither appropriate for comparing putative MEGS with the same size nor different sizes.

In the left panel with four genes, genes  $a$  and  $b$  are mutually exclusive. Each gene is mutated in 3/16 patients.  $\Gamma(a,b) = 3/16 + 3/16 = 3/8$  and  $T(a,b) = 3/8$ , thus  $W(a,b) = 3/8$ . Genes  $c$  and  $d$  are randomly mutated. Gene  $c$  covers 50% patients and gene  $d$  covers  $2\alpha$  patients. In this case, it is easy to verify that  $W(c,d) = 1/2$  for any value of  $\alpha$  when sample size is infinite. Thus, the weight statistic will choose  $(c,d)$  but not  $(a,b)$ . Note that, the current calculation is based on proportion assuming infinite sample size, suggesting that increasing sample size will not solve the problem.

In the right panel, genes  $e$  (mutated in 1/4 proportion of patients) and  $f$  (mutated in 1/4 patients) are mutually exclusive but  $g$  (mutated in  $\beta$  proportion of patients) is randomly mutated. Thus  $W(e, f) = 0.5$ . Because  $g$  is randomly mutated, so it has 50% probability to be less overlap with  $(e, f)$ , which gives  $W(e, f, g) > 0.5$ , i.e. the probability of choosing  $(e, f, g)$  is 50%, even when sample size goes to infinity.

In summary, the weight statistic is not suitable as a criterion for choosing MEGS, even when sample size is infinite. However, when the coverage of MEGS is higher than 50%, the performance of the weight statistic increases. But even in this case, it may include many false positive genes according to our simulations. Moreover, Dendrix only performs permutations for evaluating the nominal significance of the selected MEGS without correcting for multiple testing.

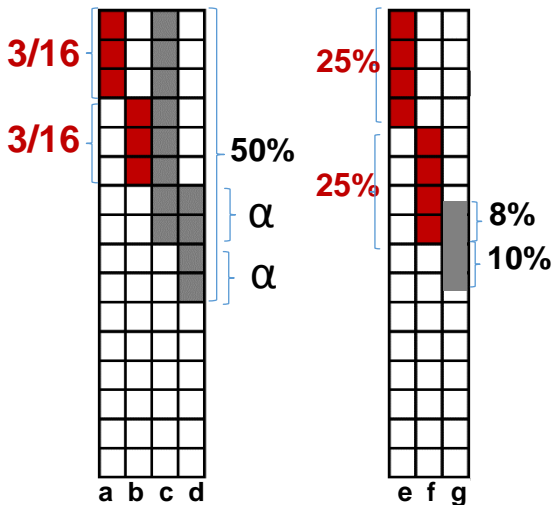

### 3. Mutex

Mutex has two innovations: a new metric for measuring MEGS and a search strategy for search genes with common downstream targets. Mutex also uses permutations to derive null distribution and thus it has correct type-I error rates. Here, we briefly describe their basic idea of defining mutual exclusivity, although they used complicated permutations. Consider a set of  $K$  genes. For each gene  $k$ , Mutex merges the mutations of the other  $K-1$  genes as a “super-gene” and tests the mutual exclusivity between gene  $k$  and the super-gene to derive  $P_k$ . The metric for testing the set of  $M$  gene is defined as the weakest signal, i.e.  $\max P_k$ . Using the weakest signal for each set of genes likely excludes false positive genes. Although this statistic is intuitively attractive, it has low accuracy, particularly for imbalanced MEGS, as we show in simulations. In addition, our MEGSA can be adapted to search for MEGS using their databases for common downstream targets.

### 4. LRT-SB

Szczurek and Beerenwinkel (2014) derived a likelihood ratio statistic based on a data generative model different from us. To discuss, we assume that there is no measurement error in the mutation data. In their data generative model, they assumed that background mutations could only happen for patients who had MEGS mutations. Thus, for a patient with one mutation in the  $m$  genes in consideration, this mutation must not be background mutation. This is apparently not reasonable.

This assumption leads to a likelihood function  $L(\gamma, \pi; A_0)$ :



$$\log L(\gamma, \pi; A_0) = q_0 \log(1 - \gamma) + \sum_{k=1}^m q_k (\log(\gamma) + \log(k/m) + (k-1)\log(\pi) + (m-k)\log(1-\pi)),$$

where  $\gamma$  is the coverage of MEGS,  $\pi$  is the background mutation rate (for all genes),  $A_0$  is observed mutation matrix,  $m$  is the number of genes in the MEGS and  $q_k$  is the number of rows in  $A_0$  that have  $k$  mutations ( $k = 0, 1, \dots, m$ ).

Here,  $\gamma = 0$  corresponds to the null hypothesis that these genes are not in MEGS. However, this likelihood degrades when  $\gamma = 0$ . Thus, they cannot define a likelihood ratio test in a standard way.

To solve this problem, they derived a likelihood function under the null hypothesis, denoted as  $L_0(\Pi; A_0)$ :

$$\log L_0(\Pi; A_0) = \sum_{g=1}^m (k_g \log(\pi_g) + (m - k_g) \log(1 - \pi_g)),$$

where  $\Pi = (\pi_1, \dots, \pi_m)$ ,  $\pi_g$  is the background mutation rates of gene  $g$ ,  $k_g$  is the number of samples that have mutations in gene  $g$ ,  $g = 1, \dots, m$ .

Then, they derived the likelihood ratio statistic as

$$LRT = 2[\log L(\hat{\gamma}_1, \hat{\pi}_1; A_0) - \log L_0(\hat{\Pi}_0; A_0)],$$

where  $\hat{\gamma}_1$  and  $\hat{\pi}_1$  are estimated under  $H_1$  and  $\hat{\Pi}_0$  is estimated under  $H_0$ . Because the two models are not nested, LRT does not follow  $\chi_1^2$  asymptotically. The authors applied the Vuong's method to derive a statistic (referred as LRT-SB)

$$LRT-SB = \frac{1}{2\sqrt{n\sigma}} (LRT - \log(n)(2 - m)).$$

Here,  $n$  is the number of patients and  $m$  is the number of genes in consideration. The authors claimed that LRT-SB followed  $N(0, 1)$  under  $H_0$  and calculated the  $P$ -value as  $1 - \Phi(LRT-SB)$ . However, they interpreted the Vuong's method incorrectly.

The Vuong's method was originally developed for comparing two models that were not nested. The "null hypothesis" for Vuong's statistic is that the two models ( $H_0, H_1$  in this case) are equally likely given the data (the mutation matrix in this case). If data are generated under  $H_0$  (null hypothesis for ME), LRT-SB does not follow  $N(0, 1)$ , as is shown in **Supplementary Figure S2**.

Moreover, the authors assume equal background mutation rate across genes. Thus it is expected to have low power for imbalanced MEGS even if the null distribution can be fixed.
